# Supplementary material for: Zero-field slow relaxation of magnetization in cobalt(ii) single-ion magnets: suppression of quantum tunneling of magnetization by tailoring the intermolecular magnetic coupling
Source: Royal Society of Chemistry journal article supplement (doi:10.1039/d0ra08286d), 2020-01-01
Supplement: d0ra08286d1.pdf [file d0ra08286d1.pdf]

## Zero-field Slow Relaxation of Magnetization in Cobalt(II) Single-ion Magnets: Suppression of Quantum Tunneling of Magnetization by Tailoring the Intermolecular Magnetic Coupling

Ryoji Mitsuhashi,<sup>a\*</sup> Satoshi Hosoya,<sup>b</sup> Takayoshi Suzuki<sup>c,d</sup>, Yukinari Sunatsuki,<sup>c</sup> Hiroshi Sakiyama,<sup>c</sup> and Masahiro Mikuriya<sup>b</sup>

<sup>a</sup> *Institute of Liberal Arts and Science, Kanazawa University, Kakuma, Kanazawa, Ishikawa 920-1192, Japan*

<sup>b</sup> *School of Science and Technology, Kwansei Gakuin University, 2-1 Gakuen, Sanda, Hyogo 669-1337, Japan*

<sup>c</sup> *Department of Chemistry, Faculty of Science, Okayama University, 3-1-1 Tsushima-naka, Kita-ku, Okayama 700-8530, Japan*

<sup>d</sup> *Research Institute for Interdisciplinary Science, Okayama University, 3-1-1 Tsushima-naka, Kita-ku, Okayama 700-8530, Japan*

<sup>e</sup> *Department of Science, Faculty of Science, Yamagata University, 1-4-12 Kojirakawa, Yamagata 990-8560, Japan*

Contents:

### 1. X-Ray crystallography

**Table S1** Crystallographic information.

**Table S2.** Selected bond distances and angles of Co complexes (Å, °).

**Table S3.** Selected crystallographic information of the Zn analogues.

**Table S4.** Selected bond distances, angles, and dihedral angles of Zn Complexes (Å, °).

**Table S5** Intrachain and the shortest interchain M···M distances (Å).

**Table S6** Hydrogen-bond distances (Å) and angles (°).

### 2. Magnetic measurements.

**Fig. S1** Temperature dependence of the  $\chi_M T$  product for (a) **1**·CH<sub>3</sub>OH, (c) **2** and (e) **3** in an applied field of 5.0 kOe. Field dependence of the magnetization for (b) **1**·CH<sub>3</sub>OH, (d) **2** and (f) **3** at 2, 4, 6 and 8 K (red green blue and magenta points, respectively).

**Fig. S2** Dc field dependence of (a) the in-phase  $\chi'_M$  vs. frequency plots and (b) out-of-phase  $\chi''_M$  vs. frequency plots for **1**·CH<sub>3</sub>OH at 1.9 K with ac frequency of 0.1–1488 Hz. The lines are a guide for the eye.

**Fig. S3** Temperature dependence of (a) the in-phase  $\chi'_M$  vs. frequency plots and (b) out-of-phase  $\chi''_M$  vs. frequency plots for **1**·CH<sub>3</sub>OH in 1.4 kOe dc field with ac frequency of 0.1–1488 Hz. The lines are a guide for the eye.

**Fig. S4** Cole-Cole plot for **1**·CH<sub>3</sub>OH in 1.4 kOe dc field from 1.9 to 6.5 K. The solid lines represent the fit to a generalized Debye model.

**Table S7** Cole-Cole fit values for **1**·CH<sub>3</sub>OH in 1.4 kOe dc field from 1.9 to 6.5 K.

**Fig. S5** Temperature dependence of (a) the in-phase  $\chi'_M$  vs. frequency plots and (b) out-of-phase  $\chi''_M$  vs. frequency plots for **2** in 0 Oe dc field with ac frequency of 0.1–1488 Hz (1.9 K–8.0 K). The lines are a guide for the eye.

**Fig. S6** Dc field dependence of (a) the in-phase  $\chi'_M$  vs. frequency plots and (b) out-of-phase  $\chi''_M$  vs. frequency plots for **2** with ac frequency of 0.1–148.8 Hz at 1.9 K. The lines are a guide for the eye.

**Fig. S7** Temperature dependence of (a) the in-phase  $\chi'_M$  vs. frequency plots and (b) out-of-phase  $\chi''_M$  vs. frequency plots for **2** in 0.4 kOe dc field with ac frequency of 0.1–1488 Hz (1.9 K–8.0 K). The lines are a guide for the eye. The lines are a guide for the eye.

**Fig. S8** Cole-Cole plot for **2** (a) in zero field and (b) in 0.4 kOe dc field from 1.9 to 8 K. The solid lines represent the fit to a generalized Debye model.

**Table S8** Cole-Cole fit values for **2** in zero dc field from 1.9 to 8.0 K.

**Table S9** Cole-Cole fit values for **2** in 0.4 kOe dc field from 1.9 to 8.0 K.

**Fig. S9** Temperature dependence of (a) the in-phase  $\chi'_M$  vs. frequency plots and (b) out-of-phase  $\chi''_M$  vs. frequency plots for **3** in 0 Oe dc field with ac frequency of 1–1488 Hz (1.9 K–8.0 K). The lines are a guide for the eye.

**Fig. S10** Dc field dependence of (a) the in-phase  $\chi'_M$  vs. frequency plots and (b) out-of-phase  $\chi''_M$  vs. frequency plots for **3** with ac frequency of 0.1–1488 Hz at 4 K. The lines are a guide for the eye.

**Fig. S11** Temperature dependence of (a) the in-phase  $\chi'_M$  vs. frequency plots and (b) out-of-phase  $\chi''_M$  vs. frequency plots for **3** in 0.8 kOe dc field with ac frequency of 0.03–1488 Hz (2.8 K–8.0 K). The lines are a guide for the eye.

**Fig. S12** Cole-Cole plot for **3** (a) in zero field and (b) in 0.8 kOe dc field from 1.9 to 8 K. The solid lines represent the fit to a generalized Debye model.

**Table S10** Cole-Cole fit values for **3** in zero dc field from 1.9 to 8.0 K.

**Table S11** Cole-Cole fit values for **3** in 0.8 kOe dc field from 2.8 to 8.0 K.

**Fig. S13** Cole-Cole plot for **3** under 0.2–5.0 kOe. The solid lines represent the fit to a generalized Debye model.

**Table S12** Cole-Cole fit values for **3** at 4 K with an applied dc field of 0.2 to 5.0 kOe.

**Fig. S14** Temperature dependence of (a) the in-phase  $\chi'_M$  vs. frequency plots and (b) out-of-phase  $\chi''_M$  vs. frequency plots for **4**·CH<sub>3</sub>OH in 0 Oe dc field with ac frequency of 1–1488 Hz (1.9 K–6.0 K). The lines are a guide for the eye.

**Fig. S15** Dc field dependence of (a) the in-phase  $\chi'_M$  vs. frequency plots and (b) out-of-phase  $\chi''_M$  vs. frequency plots for **4**·CH<sub>3</sub>OH with ac frequency of 1–1488 Hz at 3.4 K. The lines are a guide for the eye.

**Fig. S16** Temperature dependence of (a) the in-phase  $\chi'_M$  vs. frequency plots and (b) out-of-phase  $\chi''_M$  vs. frequency plots for  $4\cdot\text{CH}_3\text{OH}$  in 0.4 kOe dc field with ac frequency of 1–1488 Hz (1.9 K–6.0 K). The lines are a guide for the eye.

**Fig. S17** Temperature dependence of (a) the in-phase  $\chi'_M$  vs. frequency plots and (b) out-of-phase  $\chi''_M$  vs. frequency plots for  $4\cdot\text{CH}_3\text{OH}$  in 1.8 kOe dc field with ac frequency of 0.1–1488 Hz (1.9 K–7.0 K). The lines are a guide for the eye.

**Fig. S18** Cole-Cole plot for  $4\cdot\text{CH}_3\text{OH}$  (a) in zero field from 1.9 to 6 K, (b) in 0.4 kOe dc field from 1.9 to 6 K and (c) in 1.8 Oe dc field from 1.9 to 7 K. The solid lines represent the fit to a generalized Debye model.

**Table S13** Cole-Cole fit values for  $4\cdot\text{CH}_3\text{OH}$  in zero dc field from 1.9 to 6.0 K.

**Table S14** Cole-Cole fit values for  $4\cdot\text{CH}_3\text{OH}$  in 0.4 kOe dc field from 1.9 to 6.0 K.

**Table S15** Cole-Cole fit values for  $4\cdot\text{CH}_3\text{OH}$  in 1.8 kOe dc field from 1.9 to 7.0 K.

**Fig. S19** Temperature dependence of (a) the in-phase  $\chi'_M$  vs. frequency plots and (b) out-of-phase  $\chi''_M$  vs. frequency plots for  $1'_{0.33}\cdot\text{CH}_3\text{OH}$  in 0 kOe dc field with ac frequency of 1–1488 Hz (1.9 K–2.6 K). The lines are a guide for the eye.

**Fig. S20** Temperature dependence of (a) the in-phase  $\chi'_M$  vs. frequency plots and (b) out-of-phase  $\chi''_M$  vs. frequency plots for  $1'_{0.33}\cdot\text{CH}_3\text{OH}$  in 1.4 kOe dc field with ac frequency of 0.1–1488 Hz. The lines are a guide for the eye.

**Fig. S21** Dc field dependence of (a) the in-phase  $\chi'_M$  vs. frequency plots and (b) out-of-phase  $\chi''_M$  vs. frequency plots for  $1'_{0.33}\cdot\text{CH}_3\text{OH}$  with ac frequency of 1–1488 Hz at 5.5 K. The lines are a guide for the eye.

**Fig. S22** Temperature dependence of (a) the in-phase  $\chi'_M$  vs. frequency plots and (b) out-of-phase  $\chi''_M$  vs. frequency plots for  $1'_{0.12}\cdot\text{CH}_3\text{OH}$  in 0 kOe dc field with ac frequency of 1–1488 Hz (1.9 K–2.6 K). The lines are a guide for the eye.

**Fig. S23** Temperature dependence of (a) the in-phase  $\chi'_M$  vs. frequency plots and (b) out-of-phase  $\chi''_M$  vs. frequency plots for  $1'_{0.12}\cdot\text{CH}_3\text{OH}$  in 1.4 kOe dc field with ac frequency of 0.1–1488 Hz. The lines are a guide for the eye.

**Fig. S24** Dc field dependence of (a) the in-phase  $\chi'_M$  vs. frequency plots and (b) out-of-phase  $\chi''_M$  vs. frequency plots for  $1'_{0.12}\cdot\text{CH}_3\text{OH}$  with ac frequency of 1–1488 Hz at 5.5 K. The lines are a guide for the eye.

**Fig. S25** Cole-Cole plot for (a)  $1'_{0.33}\cdot\text{CH}_3\text{OH}$  and (b)  $1'_{0.12}\cdot\text{CH}_3\text{OH}$  in 1.4 kOe dc field from 1.9 to 8 K. The solid lines represent the fit to a generalized Debye model.

**Table S16** Cole-Cole fit values for  $1'_{0.33}\cdot\text{CH}_3\text{OH}$  in 1.4 kOe dc field from 1.9 to 7.5 K.

**Table S17** Cole-Cole fit values for  $1'_{0.12}\cdot\text{CH}_3\text{OH}$  in 1.4 kOe dc field from 1.9 to 8.0 K.

**Fig. S26** Temperature dependence of (a) the in-phase  $\chi'_M$  vs. frequency plots and (b) out-of-phase  $\chi''_M$  vs. frequency plots for  $2'_{0.52}$  in 0 kOe dc field with ac frequency of 0.03–1488 Hz (1.9 K–8.0 K). The lines are a guide for the eye.

**Fig. S27** Cole-Cole plot for  $2'_{0.52}$  in zero field from 1.9 to 8 K. The solid lines represent the fit to a generalized Debye model.

**Table S18** Cole-Cole fit values for  $2'_{0.52}$  in zero dc field from 1.9 to 8.0 K.

**Fig. S28** Temperature dependence of (a) the in-phase  $\chi'_M$  vs. frequency plots and (b) out-of-phase  $\chi''_M$  vs. frequency plots for  $\mathbf{3}'_{0.67}$  in 0 kOe dc field with ac frequency of 0.03–1488 Hz (2.8 K–8.0 K). The lines are a guide for the eye.

**Fig. S29** Cole-Cole plot for  $\mathbf{3}'_{0.67}$  in zero field from 2.8 to 8 K. The solid lines represent the fit to a generalized Debye model.

**Table S19** Cole-Cole fit values for  $\mathbf{3}'_{0.67}$  in zero dc field from 2.8 to 8.0 K.

**Fig. S30** Temperature dependence of the relaxation time  $\tau$  for  $\mathbf{1}\cdot\text{CH}_3\text{OH}$ ,  $\mathbf{1}'_{0.33}\cdot\text{CH}_3\text{OH}$  and  $\mathbf{1}'_{0.12}\cdot\text{CH}_3\text{OH}$  under 1.4 kOe dc field. The dashed lines indicate fitted lines for a single relaxation process of Raman  $\tau^{-1} = CT^n$  and phonon-bottleneck limited direct process  $\tau^{-1} = A_{pb}T^2$ . The solid lines indicate the sum of the two relaxation processes.

**Fig. S31** Field dependence of the relaxation time  $\tau$  for  $\mathbf{3}$  at 4.0 K. The dashed lines indicate fitted lines for a single relaxation process of QTM  $\tau^{-1} = B_1/(1+B_2H^2)$ , Raman  $\tau^{-1} = CT^n$  and direct process  $\tau^{-1} = ATH^d$ . The solid lines indicate the sum of the two relaxation processes.

**Table S20** Fitting parameters for the relaxation dynamics in  $\mathbf{1}\cdot\text{CH}_3\text{OH}$ ,  $\mathbf{1}'_{0.33}\cdot\text{CH}_3\text{OH}$  and  $\mathbf{1}'_{0.12}\cdot\text{CH}_3\text{OH}$ .

**Table S21** Fitting parameters for the relaxation dynamics in  $\mathbf{2}$  and  $\mathbf{2}'_{0.52}$ .

**Table S22** Fitting parameters for the relaxation dynamics in  $\mathbf{3}$  and  $\mathbf{3}'_{0.67}$ .

**Table S23** Fitting parameters for the relaxation dynamics in  $\mathbf{4}\cdot\text{CH}_3\text{OH}$ .

### 3. Powder X-ray diffraction measurement.

**Fig. S32** Powder XRD patterns of  $\mathbf{1}\cdot\text{CH}_3\text{OH}$ ,  $\mathbf{1}'_{0.12}\cdot\text{CH}_3\text{OH}$ ,  $\mathbf{1}'_{0.33}\cdot\text{CH}_3\text{OH}$  and the simulated pattern of  $[\text{Zn}(\text{Himl})_2]\cdot\text{CH}_3\text{OH}$  at room temperature.

**Fig. S33** Powder XRD patterns of  $\mathbf{2}$ , and  $\mathbf{2}'_{0.52}$  at room temperature, and the simulated pattern of  $[\text{Zn}(\text{Himn})_2]$  at 90 K.

**Fig. S34** Powder XRD patterns of  $\mathbf{3}$  and  $\mathbf{3}'_{0.67}$  at room temperature, and the simulated patterns of  $[\text{Zn}(\text{Hthp})_2]$  at 90 K.

## 1. X-ray crystallography

**Table S1.** Crystallographic information.

| Complex                                                                                                                         | 1·CH <sub>3</sub> OH                                            | 2                                                               | 3                                                               | 4·CH <sub>3</sub> OH                                            |
|---------------------------------------------------------------------------------------------------------------------------------|-----------------------------------------------------------------|-----------------------------------------------------------------|-----------------------------------------------------------------|-----------------------------------------------------------------|
| Chemical formula                                                                                                                | C <sub>19</sub> H <sub>18</sub> CoN <sub>4</sub> O <sub>3</sub> | C <sub>18</sub> H <sub>18</sub> CoN <sub>4</sub> O <sub>2</sub> | C <sub>20</sub> H <sub>22</sub> CoN <sub>4</sub> O <sub>2</sub> | C <sub>21</sub> H <sub>26</sub> CoN <sub>4</sub> O <sub>5</sub> |
| Formula weight                                                                                                                  | 409.30                                                          | 381.29                                                          | 409.34                                                          | 473.39                                                          |
| Color and shape of crystal                                                                                                      | red, needle                                                     | red, prism                                                      | red, platelet                                                   | red, platelet                                                   |
| Size of specimen (mm <sup>3</sup> )                                                                                             | 0.36 × 0.12 × 0.12                                              | 0.45 × 0.20 × 0.20                                              | 0.30 × 0.30 × 0.20                                              | 0.14 × 0.12 × 0.06                                              |
| Crystal system                                                                                                                  | orthorhombic                                                    | monoclinic                                                      | monoclinic                                                      | monoclinic                                                      |
| Space group                                                                                                                     | <i>Pbca</i>                                                     | <i>P2<sub>1</sub>/n</i>                                         | <i>C2/c</i>                                                     | <i>P2<sub>1</sub>/c</i>                                         |
| <i>a</i> / Å                                                                                                                    | 9.6795(11)                                                      | 11.9830(19)                                                     | 13.789(3)                                                       | 14.6617(18)                                                     |
| <i>b</i> / Å                                                                                                                    | 14.4187(16)                                                     | 7.6704(13)                                                      | 11.399(3)                                                       | 19.303(3)                                                       |
| <i>c</i> / Å                                                                                                                    | 25.494(3)                                                       | 18.692(3)                                                       | 12.212(3)                                                       | 7.5546(9)                                                       |
| $\beta$ / °                                                                                                                     |                                                                 | 105.227(2)                                                      | 116.361(4)                                                      | 104.276(3)                                                      |
| <i>V</i> / Å <sup>3</sup>                                                                                                       | 3558.1(7)                                                       | 1657.8(5)                                                       | 1720.0(7)                                                       | 2072.1(5)                                                       |
| <i>Z</i>                                                                                                                        | 8                                                               | 4                                                               | 4                                                               | 4                                                               |
| <i>T</i> / K                                                                                                                    | 90(2)                                                           | 90(2)                                                           | 90(2)                                                           | 90(2)                                                           |
| <i>D</i> <sub>calc</sub> / g cm <sup>-3</sup>                                                                                   | 1.528                                                           | 1.528                                                           | 1.581                                                           | 1.517                                                           |
| <i>F</i> (000)                                                                                                                  | 1688                                                            | 788                                                             | 852                                                             | 988                                                             |
| $\mu$ (Mo-K $\alpha$ ) / mm <sup>-1</sup>                                                                                       | 0.993                                                           | 1.055                                                           | 1.023                                                           | 0.870                                                           |
| <i>R</i> <sub>int</sub>                                                                                                         | 0.0382                                                          | 0.0378                                                          | 0.0367                                                          | 0.1195                                                          |
| 2 $\theta$ <sub>max</sub> / °                                                                                                   | 57                                                              | 57                                                              | 57                                                              | 55                                                              |
| No. of independent reflection                                                                                                   | 4417                                                            | 3976                                                            | 2101                                                            | 4730                                                            |
| <i>R</i> <sub>1</sub> ( <i>F</i> <sup>2</sup> : <i>F</i> <sub>o</sub> <sup>2</sup> > 2s ( <i>F</i> <sub>o</sub> <sup>2</sup> )) | 0.0363                                                          | 0.0419                                                          | 0.0403                                                          | 0.0651                                                          |
| <i>wR</i> <sub>2</sub> ( <i>F</i> <sup>2</sup> : all data)                                                                      | 0.0946                                                          | 0.1006                                                          | 0.1231                                                          | 0.1515                                                          |

$$R_1 = \frac{\sum ||F_o| - |F_c||}{\sum |F_o|}, wR_2 = [\frac{\sum (F_o^2 - F_c^2)^2}{\sum w(F_o^2)^2}]^{1/2}$$

**Table S2.** Selected bond distances and angles of Co complexes (Å, °).

|                       | 1·CH <sub>3</sub> OH | 2          | 3          | 4·CH <sub>3</sub> OH |
|-----------------------|----------------------|------------|------------|----------------------|
| Co–O                  | 1.9220(13)           | 1.9389(16) | 1.9184(17) | 1.926(3)             |
|                       | 1.9309(13)           | 1.9357(16) |            | 1.922(3)             |
| Co–N                  | 1.9776(15)           | 1.9593(18) | 1.9551(19) | 1.955(3)             |
|                       | 1.9566(16)           | 1.9586(18) |            | 1.958(3)             |
| O–Co–O                | 118.68(6)            | 109.91(7)  | 108.84(10) | 115.35(13)           |
| N–Co–N                | 126.70(6)            | 126.30(8)  | 125.99(11) | 126.85(15)           |
| O–Co–N (bite angle)   | 93.11(6)             | 93.56(7)   | 96.93(7)   | 93.60(14)            |
|                       | 94.67(6)             | 94.25(7)   |            | 93.63(14)            |
| O–Co–N (inter ligand) | 109.50(6)            | 113.33(7)  | 114.06(8)  | 108.20(13)           |
|                       | 116.15(6)            | 120.02(7)  |            | 120.18(14)           |

**Table S3.** Selected crystallographic information of the Zn analogues.

| Complex                                       | [Zn(Himl) <sub>2</sub> ]·CH <sub>3</sub> OH <sup>1</sup>         | [Zn(Himn) <sub>2</sub> ] <sup>2</sup>                            | [Zn(Hthp) <sub>2</sub> ] <sup>3</sup>                            |
|-----------------------------------------------|------------------------------------------------------------------|------------------------------------------------------------------|------------------------------------------------------------------|
| Chemical formula                              | C <sub>19</sub> H <sub>18</sub> N <sub>4</sub> O <sub>3</sub> Zn | C <sub>18</sub> H <sub>18</sub> N <sub>4</sub> O <sub>2</sub> Zn | C <sub>20</sub> H <sub>22</sub> N <sub>4</sub> O <sub>2</sub> Zn |
| Formula weight                                | 415.74                                                           | 387.73                                                           | 415.78                                                           |
| Crystal system                                | orthorhombic                                                     | monoclinic                                                       | monoclinic                                                       |
| Space group                                   | <i>Pbca</i>                                                      | <i>P2<sub>1</sub>/n</i>                                          | <i>C2/c</i>                                                      |
| <i>a</i> / Å                                  | 9.6943(19)                                                       | 12.0318(15)                                                      | 13.7667(14)                                                      |
| <i>b</i> / Å                                  | 14.77g(16)                                                       | 7.6706(10)                                                       | 11.4666(11)                                                      |
| <i>c</i> / Å                                  | 25.494(3)                                                        | 18.617(2)                                                        | 12.2213(12)                                                      |
| <i>β</i> / °                                  |                                                                  | 105.089(2)                                                       | 116.242(2)                                                       |
| <i>V</i> / Å <sup>3</sup>                     | 3680.1(13)                                                       | 1658.9(4)                                                        | 1730.4(3)                                                        |
| <i>Z</i>                                      | 8                                                                | 4                                                                | 4                                                                |
| <i>T</i> / K                                  | 293(2)                                                           | 90(2)                                                            | 90(2)                                                            |
| <i>D</i> <sub>calc</sub> / g cm <sup>-3</sup> | 1.501                                                            | 1.552                                                            | 1.596                                                            |
| CCDC number                                   | 627785                                                           | 1882004                                                          | 1893923                                                          |

**Table S4.** Selected bond distances, angles, and dihedral angles of Zn Complexes (Å, °).

|                             | [Zn(Himl) <sub>2</sub> ]·CH <sub>3</sub> OH <sup>1</sup> | [Zn(Himn) <sub>2</sub> ] <sup>2</sup> | [Zn(Hthp) <sub>2</sub> ] <sup>3</sup> |
|-----------------------------|----------------------------------------------------------|---------------------------------------|---------------------------------------|
| Zn1–O1                      | 1.926(6)                                                 | 1.952(2)                              | 1.9229(16)                            |
| Zn1–O2                      | 1.937(6)                                                 | 1.9366(19)                            |                                       |
| Zn1–N2                      | 1.950(7)                                                 | 1.951(2)                              | 1.9526(19)                            |
| Zn1–N4                      | 1.928(7)                                                 | 1.952(2)                              |                                       |
| O1–Zn1–O2(O1 <sup>i</sup> ) | 113.9(3)                                                 | 107.72(8)                             | 106.98(10)                            |
| N2–Zn1–N4(N2 <sup>i</sup> ) | 128.2(3)                                                 | 127.66(10)                            | 124.53(11)                            |
| O1–Zn1–N2                   | 94.0(3)                                                  | 94.61(9)                              | 98.48(7)                              |
| O1–Zn1–N4(N2 <sup>i</sup> ) | 115.1(3)                                                 | 118.36(9)                             | 113.97(7)                             |
| O2–Zn1–N2                   | 110.9(3)                                                 | 112.84(9)                             |                                       |
| O2–Zn1–N4                   | 95.8(3)                                                  | 95.37(9)                              |                                       |

Symmetry code: (i = '-x+1, y, -z+3/2')

**Table S5** Intrachain and the shortest interchain M···M distances (Å).

|                          | Intrachain |                   | Interchain |                    |                    |            |
|--------------------------|------------|-------------------|------------|--------------------|--------------------|------------|
|                          | Co1        | Co1 <sup>i</sup>  | Co1        | Co1 <sup>iii</sup> |                    |            |
| <b>2</b>                 | Co1        | Co1 <sup>i</sup>  | 6.048(1)   | Co1                | Co1 <sup>iii</sup> | 7.6704(13) |
|                          | Co1        | Co1 <sup>ii</sup> | 6.254(1)   |                    |                    |            |
| [Zn(Himn) <sub>2</sub> ] | Zn1        | Zn1 <sup>i</sup>  | 6.103(1)   | Zn1                | Zn1 <sup>iii</sup> | 7.671(1)   |
|                          | Zn1        | Zn1 <sup>ii</sup> | 6.298(1)   |                    |                    |            |
| <b>3</b>                 | Co1        | Co1 <sup>i</sup>  | 6.359(2)   | Co1                | Co1 <sup>iv</sup>  | 7.927(2)   |
| [Zn(Hthp) <sub>2</sub> ] | Zn1        | Zn1 <sup>i</sup>  | 6.372(1)   | Zn1                | Zn1 <sup>iv</sup>  | 7.934(1)   |
| <b>4</b>                 | Co1        | Co1 <sup>i</sup>  | 6.115(1)   | Co1                | Co1 <sup>vi</sup>  | 7.5546(9)  |
|                          | Co1        | Co1 <sup>v</sup>  | 8.680(1)   |                    |                    |            |

Symmetry code: (i = '-x+1, -y+1, -z+1', ii = '-x, -y+1, -z+1', iii = 'x, y+1, z', iv = '-x+3/2, y+1/2, -z+3/2', v = '-x, -y, -z', vi = 'x, y, z+1').

<sup>1</sup> H.-S. He, *Acta Crystallogr. Sect. E Struct. Reports Online*, 2006, **62**, m3042–m3043.<sup>2</sup> R. Mitsuhashi and M. Mikuriya, *X-ray Struct. Anal. Online*, 2019, **35**, 15–16.<sup>3</sup> R. Mitsuhashi and M. Mikuriya, *X-ray Struct. Anal. Online*, 2019, **35**, 37–38.

**Table S6** Hydrogen-bond distances (Å) and angles (°).

|                                                                                     | D                                                                | H   | A                 | D–H              | H···A    | D···A      | D–H···A  |
|-------------------------------------------------------------------------------------|------------------------------------------------------------------|-----|-------------------|------------------|----------|------------|----------|
| <b>1</b> ·CH <sub>3</sub> OH                                                        | N1                                                               | H1  | O2 <sup>i</sup>   | 0.86(3)          | 1.95(3)  | 2.766(2)   | 156(2)   |
|                                                                                     | O3                                                               | H3M | O1                | 0.84             | 1.81     | 2.6483(19) | 171.7    |
|                                                                                     | N3                                                               | H3A | O3 <sup>ii</sup>  | 0.83(3)          | 1.94(3)  | 2.752(2)   | 164(2)   |
| [Zn(Himl) <sub>2</sub> ]·CH <sub>3</sub> OH <sup>Error! Bookmark not defined.</sup> | N1                                                               | H1  | O2 <sup>i</sup>   | 0.81(10)         | 2.01(10) | 2.770(10)  | 157(10)  |
|                                                                                     | O3                                                               | H3M | O1                | 0.82             | 1.88     | 2.653(10)  | 157      |
|                                                                                     | N3                                                               | H3A | O3 <sup>ii</sup>  | 0.75(9)          | 2.09(10) | 2.771(11)  | 152(11)  |
| <b>2</b>                                                                            | N1                                                               | H1  | O2 <sup>iii</sup> | 0.84(3)          | 2.03(3)  | 2.845(3)   | 164(3)   |
|                                                                                     | N3                                                               | H3A | O1 <sup>ii</sup>  | 0.83(3)          | 2.03(3)  | 2.844(2)   | 165(2)   |
| [Zn(Himn) <sub>2</sub> ] <sup>Error! Bookmark not defined.</sup>                    | N1                                                               | H1  | O2 <sup>iv</sup>  | 0.75(3)          | 2.12(3)  | 2.832(2)   | 158(3)   |
|                                                                                     | N3                                                               | H3A | O1 <sup>ii</sup>  | 0.85(3)          | 2.00(3)  | 2.828(3)   | 167(3)   |
| <b>3</b>                                                                            | N1                                                               | H1N | O1 <sup>v</sup>   | 0.81(3)          | 2.29(3)  | 3.059(3)   | 158(3)   |
|                                                                                     | [Zn(Hthp) <sub>2</sub> ] <sup>Error! Bookmark not defined.</sup> | N1  | H1N               | O1 <sup>vi</sup> | 0.88(4)  | 2.20(4)    | 3.035(3) |
| <b>4</b> ·CH <sub>3</sub> OH                                                        | N1                                                               | H1  | O5 <sup>iii</sup> | 0.85(4)          | 2.03(4)  | 2.853(5)   | 162(4)   |
|                                                                                     | N3                                                               | H3N | O1 <sup>iii</sup> | 0.795(19)        | 2.25(4)  | 2.927(5)   | 143(5)   |
|                                                                                     | O5                                                               | H5A | O3                | 0.84             | 1.95     | 2.758(4)   | 161.3    |
|                                                                                     | O5                                                               | H5A | O4                | 0.84             | 2.47     | 2.943(4)   | 116.4    |

Symmetry code: (i = 'x-1/2, y, -z+3/2'; ii = '1-x, 1-y, 1-z'; iii = '-x, -y+1, -z+1'; iv = '2-x, 1-y, 1-z' v = 'x, -y+1, z-1/2'; vi = 'x, -y+1, z+1/2').

## 2. Magnetic measurements.

Magnetic susceptibility measurements were performed with a MPMS-XL7 or MPMS-7 SQUID magnetometer. Susceptibility data were obtained in the temperature range from 1.9 to 300 K with static field of 0.5 T. The polycrystalline samples were ground into fine powders by an agate mortar. The samples were loaded into a gelatin capsule and covered in liquid paraffin to prevent field-induced orientation of crystals. All data were corrected for diamagnetism of the sample by means of Pascal's constants. The dynamic susceptibility was measured with alternating-current (ac) fields of 3 Oe magnitude and a constant direct current (dc) field of 0–5000 Oe in the frequency range from 0.03 to 1500 Hz.

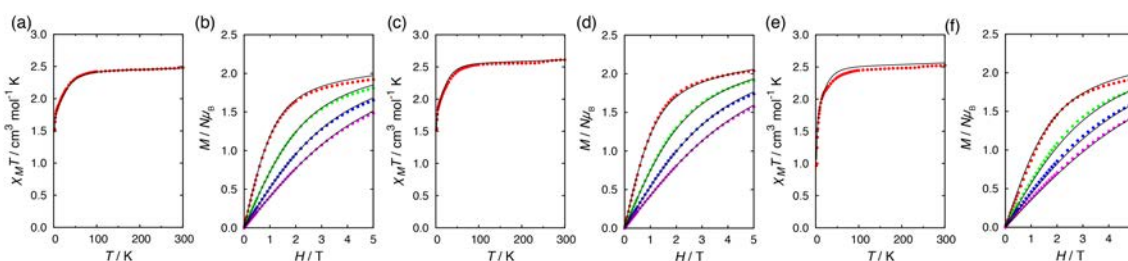

**Fig. S1** Temperature dependence of the  $\chi_M T$  product for (a) **1**·CH<sub>3</sub>OH, (c) **2** and (e) **3** in an applied field of 5.0 kOe. Field dependence of the magnetization for (b) **1**·CH<sub>3</sub>OH, (d) **2** and (f) **3** at 2, 4, 6 and 8 K (red green blue and magenta points, respectively).



Ac susceptibility measurements for  $1 \cdot \text{CH}_3\text{OH}$

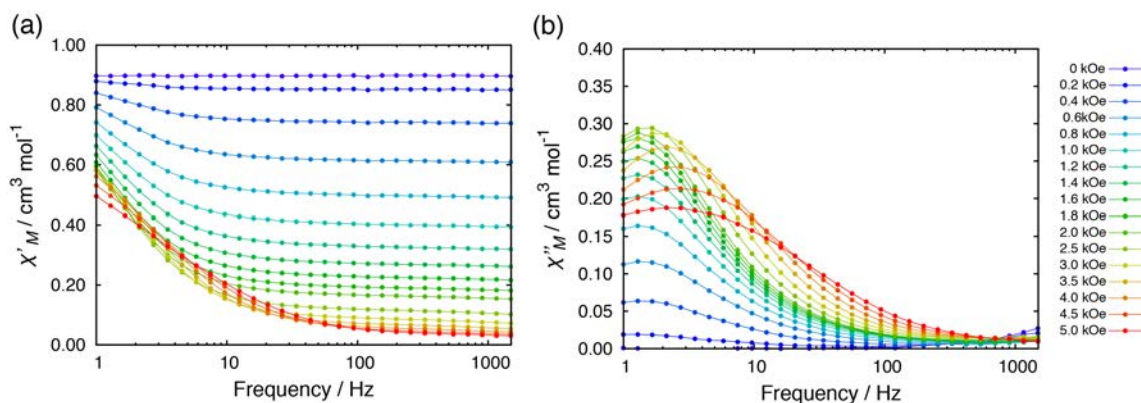

**Fig. S2** Dc field dependence of (a) the in-phase  $\chi'_M$  vs. frequency plots and (b) out-of-phase  $\chi''_M$  vs. frequency plots for  $1 \cdot \text{CH}_3\text{OH}$  at 1.9 K with ac frequency of 0.1–1488 Hz. The lines are a guide for the eye.

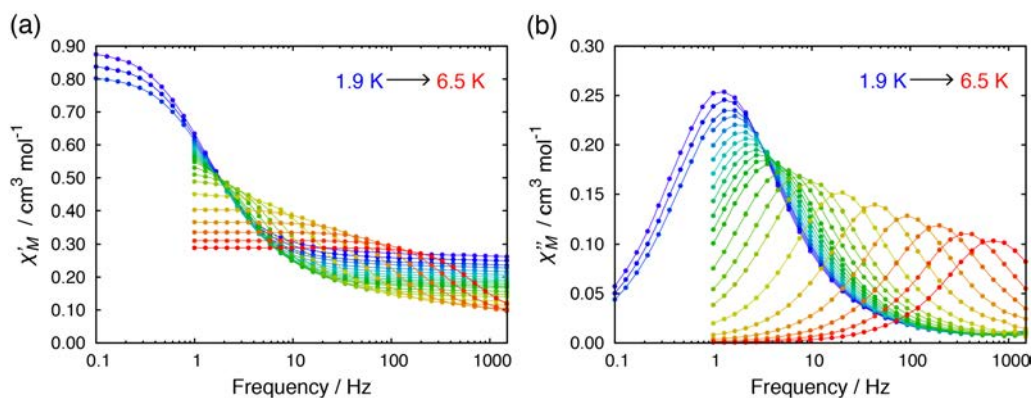

**Fig. S3** Temperature dependence of (a) the in-phase  $\chi'_M$  vs. frequency plots and (b) out-of-phase  $\chi''_M$  vs. frequency plots for  $1 \cdot \text{CH}_3\text{OH}$  in 1.4 kOe dc field with ac frequency of 0.1–1488 Hz. The lines are a guide for the eye.

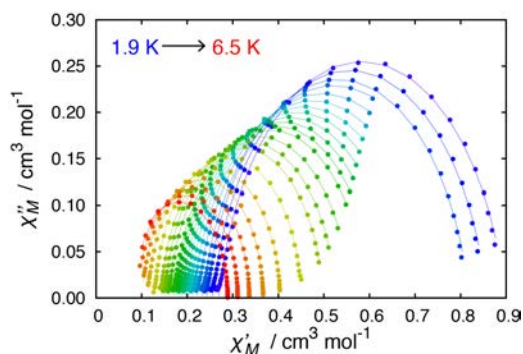

**Fig. S4** Cole-Cole plot for  $1 \cdot \text{CH}_3\text{OH}$  in 1.4 kOe dc field from 1.9 to 6.5 K. The solid lines represent the fit to a generalized Debye model.

**Table S7** Cole-Cole fit values for **1**-CH<sub>3</sub>OH in 1.4 kOe dc field from 1.9 to 6.5 K.

| $T / \text{K}$ | $\chi_S / \text{cm}_3 \text{ mol}^{-1}$ | $\chi_T / \text{cm}_3 \text{ mol}^{-1}$ | $\tau / \text{s}$     | $\alpha$ |
|----------------|-----------------------------------------|-----------------------------------------|-----------------------|----------|
| 1.9            | 0.2689                                  | 0.8975                                  | $1.26 \times 10^{-1}$ | 0.132    |
| 2.0            | 0.2553                                  | 0.8573                                  | $1.15 \times 10^{-1}$ | 0.129    |
| 2.1            | 0.2425                                  | 0.8188                                  | $1.05 \times 10^{-1}$ | 0.126    |
| 2.2            | 0.2324                                  | 0.8103                                  | $1.03 \times 10^{-1}$ | 0.146    |
| 2.3            | 0.2211                                  | 0.7721                                  | $9.16 \times 10^{-2}$ | 0.140    |
| 2.4            | 0.2115                                  | 0.7387                                  | $8.22 \times 10^{-2}$ | 0.135    |
| 2.5            | 0.2029                                  | 0.7093                                  | $7.35 \times 10^{-2}$ | 0.129    |
| 2.6            | 0.1950                                  | 0.6836                                  | $6.59 \times 10^{-2}$ | 0.125    |
| 2.7            | 0.1879                                  | 0.6591                                  | $5.86 \times 10^{-2}$ | 0.120    |
| 2.8            | 0.1815                                  | 0.6357                                  | $5.19 \times 10^{-2}$ | 0.113    |
| 2.9            | 0.1751                                  | 0.6151                                  | $4.56 \times 10^{-2}$ | 0.108    |
| 3.0            | 0.1696                                  | 0.5948                                  | $3.98 \times 10^{-2}$ | 0.101    |
| 3.2            | 0.1591                                  | 0.5585                                  | $2.97 \times 10^{-2}$ | 0.087    |
| 3.4            | 0.1501                                  | 0.5262                                  | $2.17 \times 10^{-2}$ | 0.073    |
| 3.6            | 0.1422                                  | 0.4983                                  | $1.57 \times 10^{-2}$ | 0.061    |
| 4.0            | 0.1285                                  | 0.4517                                  | $8.08 \times 10^{-3}$ | 0.043    |
| 4.5            | 0.1145                                  | 0.4044                                  | $3.57 \times 10^{-3}$ | 0.029    |
| 5.0            | 0.1029                                  | 0.3673                                  | $1.67 \times 10^{-3}$ | 0.022    |
| 5.5            | 0.0922                                  | 0.3368                                  | $8.21 \times 10^{-4}$ | 0.021    |
| 6.0            | 0.0848                                  | 0.3111                                  | $4.29 \times 10^{-4}$ | 0.014    |
| 6.5            | 0.0755                                  | 0.2892                                  | $2.26 \times 10^{-4}$ | 0.016    |

Ac susceptibility measurements for **2**.

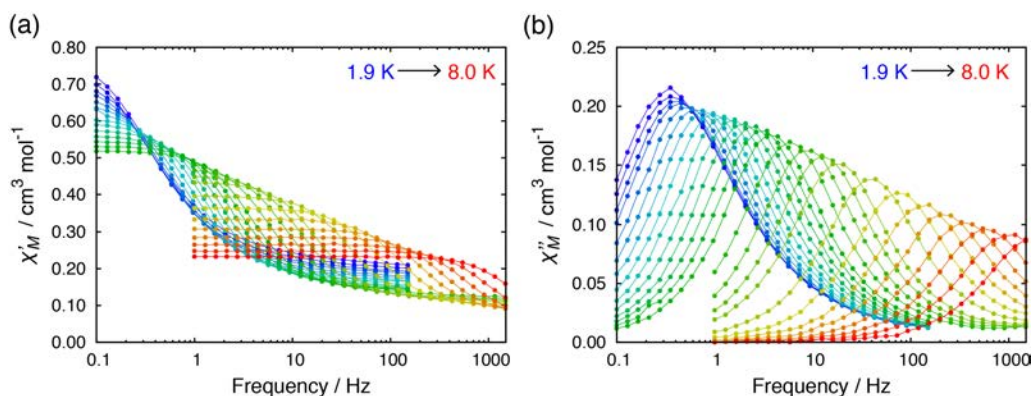

**Fig. S5** Temperature dependence of (a) the in-phase  $\chi'_M$  vs. frequency plots and (b) out-of-phase  $\chi''_M$  vs. frequency plots for **2** in 0 Oe dc field with ac frequency of 0.1–1488 Hz (1.9 K–8.0 K).

The lines are a guide for the eye.

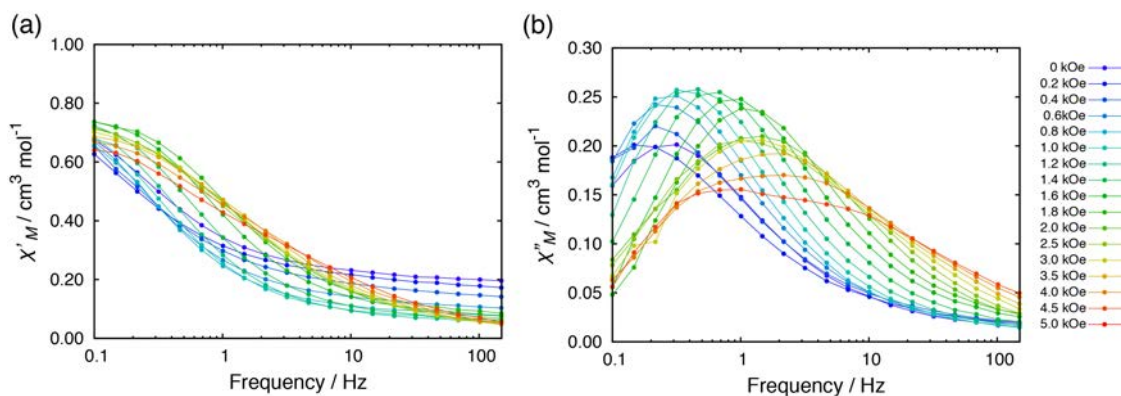

**Fig. S6** Dc field dependence of (a) the in-phase  $\chi'_M$  vs. frequency plots and (b) out-of-phase  $\chi''_M$  vs. frequency plots for **2** with ac frequency of 0.1–148.8 Hz at 1.9 K. The lines are a guide for the eye.

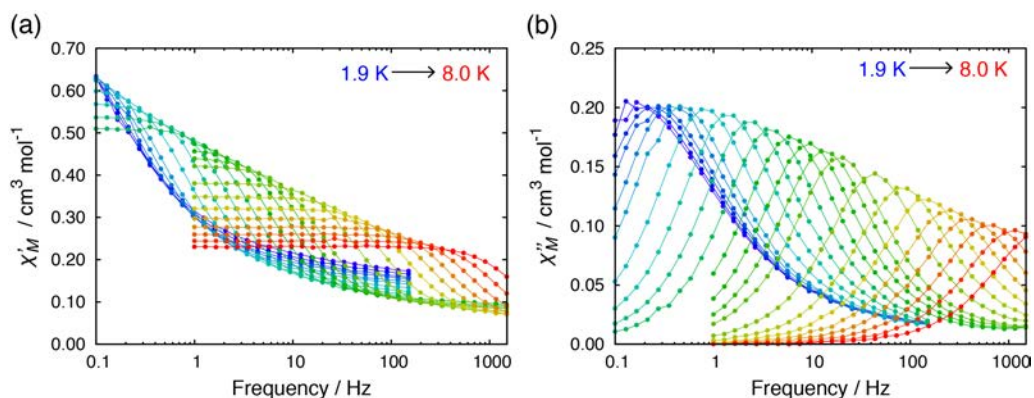

**Fig. S7** Temperature dependence of (a) the in-phase  $\chi'_M$  vs. frequency plots and (b) out-of-phase  $\chi''_M$  vs. frequency plots for **2** in 0.4 kOe dc field with ac frequency of 0.1–1488 Hz (1.9 K–8.0 K). The lines are a guide for the eye.

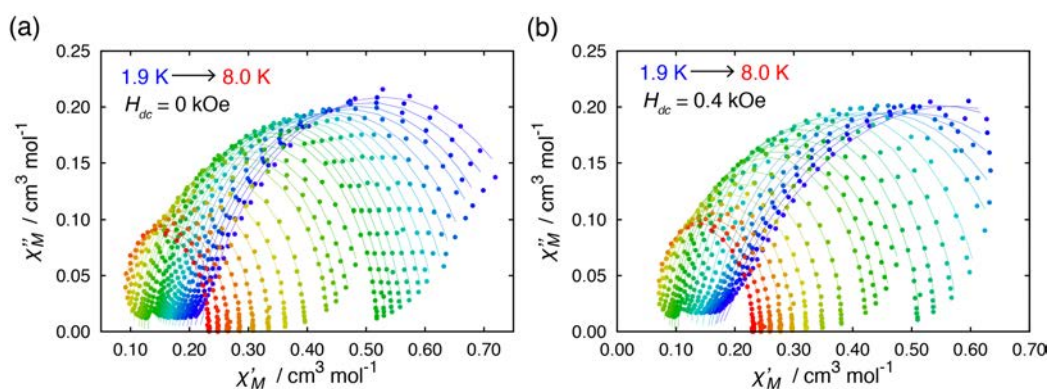

**Fig. S8** Cole-Cole plot for **2** (a) in zero field and (b) in 0.4 kOe dc field from 1.9 to 8 K. The solid lines represent the fit to a generalized Debye model.

**Table S8** Cole-Cole fit values for **2** in zero dc field from 1.9 to 8.0 K.

| $T / \text{K}$ | $\chi_S / \text{cm}^3 \text{mol}^{-1}$ | $\chi_T / \text{cm}^3 \text{mol}^{-1}$ | $\tau / \text{s}$     | $\alpha$ |
|----------------|----------------------------------------|----------------------------------------|-----------------------|----------|
| 1.9            | 0.2166                                 | 0.8411                                 | $4.45 \times 10^{-1}$ | 0.249    |
| 2.0            | 0.2078                                 | 0.8027                                 | $4.08 \times 10^{-1}$ | 0.235    |
| 2.1            | 0.2003                                 | 0.7659                                 | $3.63 \times 10^{-1}$ | 0.213    |
| 2.2            | 0.1948                                 | 0.7407                                 | $3.30 \times 10^{-1}$ | 0.200    |
| 2.3            | 0.1876                                 | 0.7028                                 | $2.74 \times 10^{-1}$ | 0.172    |
| 2.4            | 0.1816                                 | 0.6732                                 | $2.29 \times 10^{-1}$ | 0.148    |
| 2.5            | 0.1751                                 | 0.6493                                 | $1.89 \times 10^{-1}$ | 0.131    |
| 2.6            | 0.1707                                 | 0.6224                                 | $1.52 \times 10^{-1}$ | 0.107    |
| 2.7            | 0.1650                                 | 0.6021                                 | $1.22 \times 10^{-1}$ | 0.094    |
| 2.8            | 0.1591                                 | 0.5829                                 | $9.76 \times 10^{-2}$ | 0.081    |
| 2.9            | 0.1543                                 | 0.5640                                 | $7.79 \times 10^{-2}$ | 0.069    |
| 3.0            | 0.1499                                 | 0.5486                                 | $6.24 \times 10^{-2}$ | 0.061    |
| 3.1            | 0.1466                                 | 0.5348                                 | $5.00 \times 10^{-2}$ | 0.057    |
| 3.2            | 0.1430                                 | 0.5209                                 | $4.01 \times 10^{-2}$ | 0.051    |
| 3.4            | 0.1296                                 | 0.5023                                 | $2.65 \times 10^{-2}$ | 0.070    |
| 3.6            | 0.1234                                 | 0.4771                                 | $1.76 \times 10^{-2}$ | 0.060    |
| 3.8            | 0.1184                                 | 0.4561                                 | $1.21 \times 10^{-2}$ | 0.053    |
| 4.0            | 0.1141                                 | 0.4373                                 | $8.49 \times 10^{-3}$ | 0.049    |
| 4.5            | 0.1048                                 | 0.3978                                 | $3.92 \times 10^{-3}$ | 0.044    |
| 5.0            | 0.0976                                 | 0.3641                                 | $2.04 \times 10^{-3}$ | 0.038    |
| 5.5            | 0.0911                                 | 0.3351                                 | $1.16 \times 10^{-3}$ | 0.030    |
| 6.0            | 0.0833                                 | 0.3081                                 | $7.04 \times 10^{-4}$ | 0.026    |
| 6.5            | 0.0771                                 | 0.2853                                 | $4.41 \times 10^{-4}$ | 0.016    |
| 7.0            | 0.0686                                 | 0.2654                                 | $2.70 \times 10^{-4}$ | 0.017    |
| 7.5            | 0.0605                                 | 0.2485                                 | $1.60 \times 10^{-4}$ | 0.015    |
| 8.0            | 0.0522                                 | 0.2331                                 | $8.92 \times 10^{-5}$ | 0.010    |

**Table S9** Cole-Cole fit values for **2** in 0.4 kOe dc field from 1.9 to 8.0 K.

| $T / \text{K}$ | $\chi_S / \text{cm}_3 \text{ mol}^{-1}$ | $\chi_T / \text{cm}_3 \text{ mol}^{-1}$ | $\tau / \text{s}$     | $\alpha$ |
|----------------|-----------------------------------------|-----------------------------------------|-----------------------|----------|
| 1.9            | 0.1747                                  | 0.9610                                  | $1.17 \times 10^0$    | 0.399    |
| 2.0            | 0.1693                                  | 0.9159                                  | $9.68 \times 10^{-1}$ | 0.370    |
| 2.1            | 0.1650                                  | 0.8352                                  | $7.04 \times 10^{-1}$ | 0.330    |
| 2.2            | 0.1631                                  | 0.7879                                  | $5.48 \times 10^{-1}$ | 0.289    |
| 2.3            | 0.1579                                  | 0.7319                                  | $3.98 \times 10^{-1}$ | 0.240    |
| 2.4            | 0.1537                                  | 0.6897                                  | $3.00 \times 10^{-1}$ | 0.199    |
| 2.6            | 0.1441                                  | 0.6269                                  | $1.75 \times 10^{-1}$ | 0.138    |
| 2.8            | 0.1343                                  | 0.5812                                  | $1.04 \times 10^{-1}$ | 0.100    |
| 3.0            | 0.1254                                  | 0.5447                                  | $6.31 \times 10^{-2}$ | 0.077    |
| 3.2            | 0.1172                                  | 0.5149                                  | $3.94 \times 10^{-2}$ | 0.062    |
| 3.4            | 0.1026                                  | 0.4968                                  | $2.54 \times 10^{-2}$ | 0.087    |
| 3.6            | 0.0972                                  | 0.4693                                  | $1.66 \times 10^{-2}$ | 0.070    |
| 3.8            | 0.0923                                  | 0.4465                                  | $1.13 \times 10^{-2}$ | 0.062    |
| 4.0            | 0.0881                                  | 0.4264                                  | $7.85 \times 10^{-3}$ | 0.054    |
| 4.5            | 0.0795                                  | 0.3834                                  | $3.56 \times 10^{-3}$ | 0.042    |
| 5.0            | 0.0718                                  | 0.3500                                  | $1.83 \times 10^{-3}$ | 0.036    |
| 5.5            | 0.0658                                  | 0.3220                                  | $1.04 \times 10^{-3}$ | 0.032    |
| 6.0            | 0.0599                                  | 0.2982                                  | $6.23 \times 10^{-4}$ | 0.034    |
| 6.5            | 0.0561                                  | 0.2779                                  | $3.91 \times 10^{-4}$ | 0.027    |
| 7.0            | 0.0509                                  | 0.2601                                  | $2.40 \times 10^{-4}$ | 0.024    |
| 7.5            | 0.0459                                  | 0.2446                                  | $1.43 \times 10^{-4}$ | 0.020    |
| 8.0            | 0.0395                                  | 0.2311                                  | $8.15 \times 10^{-5}$ | 0.017    |

Ac susceptibility measurements for **3**.

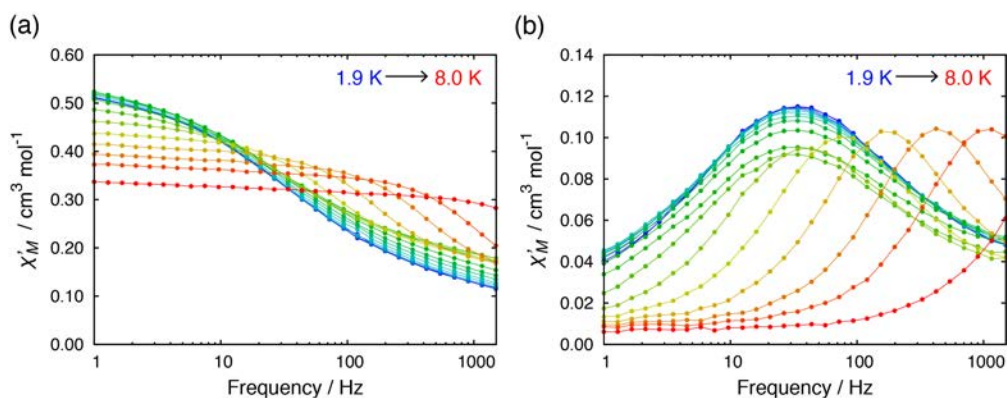

**Fig. S9** Temperature dependence of (a) the in-phase  $\chi'_M$  vs. frequency plots and (b) out-of-phase  $\chi''_M$  vs. frequency plots for **3** in 0 Oe dc field with ac frequency of 1–1488 Hz (1.9 K–8.0 K). The lines are a guide for the eye.

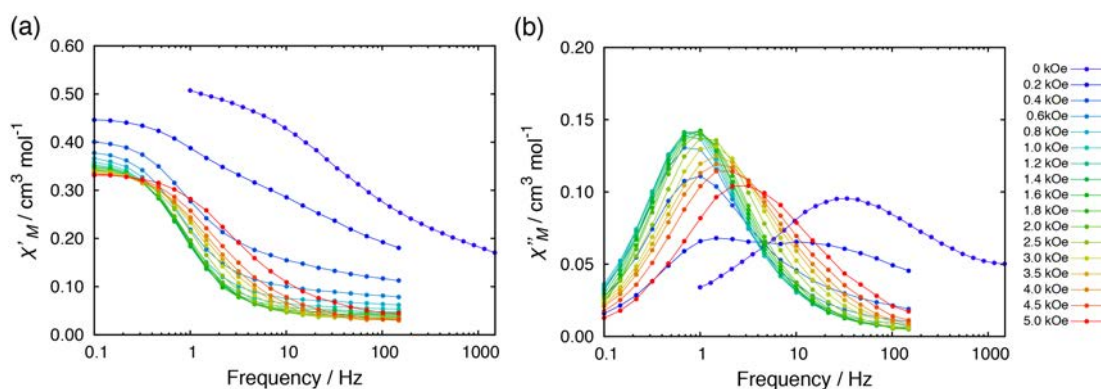

**Fig. S10** Dc field dependence of (a) the in-phase  $\chi'_M$  vs. frequency plots and (b) out-of-phase  $\chi''_M$  vs. frequency plots for **3** with ac frequency of 0.1–1488 Hz at 4 K. The lines are a guide for the eye.

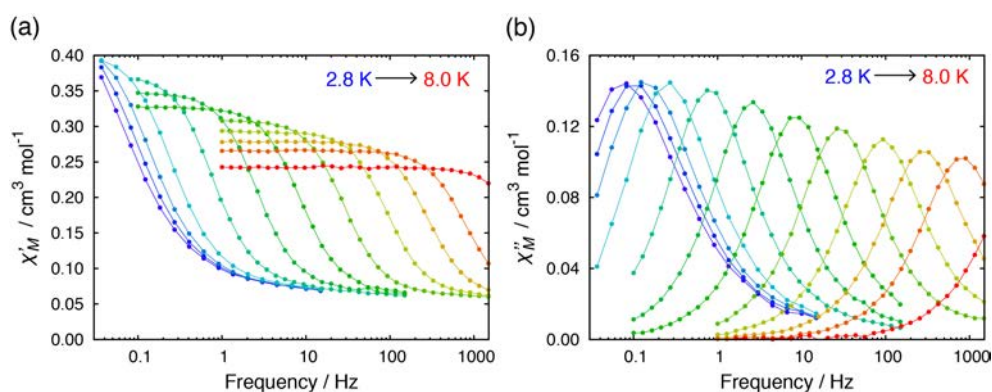

**Fig. S11** Temperature dependence of (a) the in-phase  $\chi'_M$  vs. frequency plots and (b) out-of-phase  $\chi''_M$  vs. frequency plots for **3** in 0.8 kOe dc field with ac frequency of 0.03–1488 Hz (2.8 K–8.0 K). The lines are a guide for the eye.

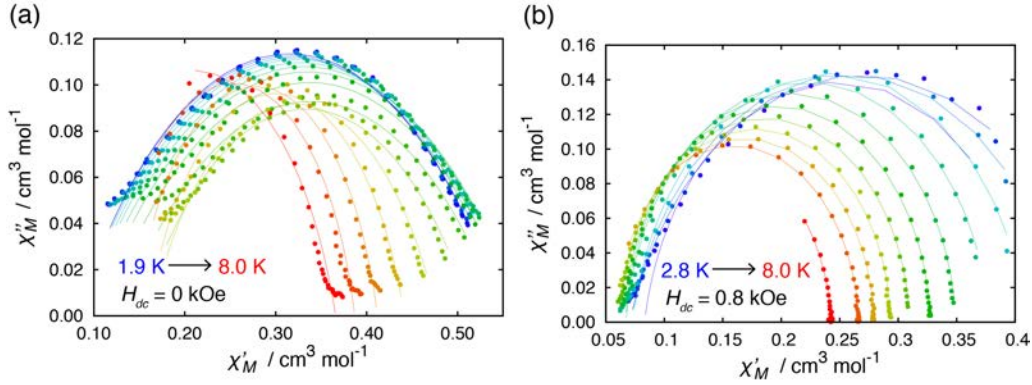

**Fig. S12** Cole-Cole plot for **3** (a) in zero field and (b) in 0.8 kOe dc field from 1.9 to 8 K. The solid lines represent the fit to a generalized Debye model.

**Table S10** Cole-Cole fit values for **3** in zero dc field from 1.9 to 8.0 K.

| $T / \text{K}$ | $\chi_S / \text{cm}^3 \text{mol}^{-1}$ | $\chi_T / \text{cm}^3 \text{mol}^{-1}$ | $\tau / \text{s}$     | $\alpha$ |
|----------------|----------------------------------------|----------------------------------------|-----------------------|----------|
| 1.9            | 0.0820                                 | 0.5495                                 | $4.15 \times 10^{-3}$ | 0.424    |
| 2.0            | 0.0820                                 | 0.5485                                 | $4.20 \times 10^{-3}$ | 0.423    |
| 2.2            | 0.0813                                 | 0.5506                                 | $4.27 \times 10^{-3}$ | 0.430    |
| 2.4            | 0.0823                                 | 0.5554                                 | $4.37 \times 10^{-3}$ | 0.437    |
| 2.6            | 0.0848                                 | 0.5611                                 | $4.44 \times 10^{-3}$ | 0.444    |
| 2.8            | 0.0871                                 | 0.5671                                 | $4.39 \times 10^{-3}$ | 0.454    |
| 3.0            | 0.0928                                 | 0.5704                                 | $4.31 \times 10^{-3}$ | 0.459    |
| 3.2            | 0.0995                                 | 0.5700                                 | $4.21 \times 10^{-3}$ | 0.462    |
| 3.5            | 0.1114                                 | 0.5645                                 | $4.05 \times 10^{-3}$ | 0.465    |
| 4.0            | 0.1306                                 | 0.5466                                 | $3.95 \times 10^{-3}$ | 0.465    |
| 4.5            | 0.1517                                 | 0.5157                                 | $3.86 \times 10^{-3}$ | 0.418    |
| 5.0            | 0.1625                                 | 0.4777                                 | $3.06 \times 10^{-3}$ | 0.328    |
| 5.5            | 0.1592                                 | 0.4416                                 | $1.80 \times 10^{-3}$ | 0.237    |
| 6.0            | 0.1453                                 | 0.4118                                 | $8.46 \times 10^{-4}$ | 0.183    |
| 6.5            | 0.1196                                 | 0.3868                                 | $3.43 \times 10^{-4}$ | 0.176    |
| 7.0            | 0.0538                                 | 0.3659                                 | $1.05 \times 10^{-4}$ | 0.238    |
| 8.0            | 0.0000                                 | 0.3301                                 | $1.12 \times 10^{-5}$ | 0.400    |

**Table S11** Cole-Cole fit values for **3** in 0.8 kOe dc field from 2.8 to 8.0 K.

| $T / \text{K}$ | $\chi_S / \text{cm}^3 \text{mol}^{-1}$ | $\chi_T / \text{cm}^3 \text{mol}^{-1}$ | $\tau / \text{s}$     | $\alpha$ |
|----------------|----------------------------------------|----------------------------------------|-----------------------|----------|
| 2.8            | 0.0830                                 | 0.4132                                 | $1.40 \times 10^0$    | 0.110    |
| 3.0            | 0.0702                                 | 0.4666                                 | $1.51 \times 10^0$    | 0.205    |
| 3.2            | 0.0712                                 | 0.4420                                 | $1.06 \times 10^0$    | 0.161    |
| 3.5            | 0.0733                                 | 0.4093                                 | $5.80 \times 10^{-1}$ | 0.099    |
| 4.0            | 0.0671                                 | 0.3785                                 | $1.93 \times 10^{-1}$ | 0.074    |
| 4.5            | 0.0669                                 | 0.3495                                 | $5.92 \times 10^{-2}$ | 0.043    |
| 5.0            | 0.0653                                 | 0.3278                                 | $1.82 \times 10^{-2}$ | 0.032    |
| 5.5            | 0.0618                                 | 0.3101                                 | $5.43 \times 10^{-3}$ | 0.033    |
| 6.0            | 0.0609                                 | 0.2938                                 | $1.68 \times 10^{-3}$ | 0.027    |

|     |        |        |                       |       |
|-----|--------|--------|-----------------------|-------|
| 6.5 | 0.0583 | 0.2793 | $5.50 \times 10^{-4}$ | 0.026 |
| 7.0 | 0.0532 | 0.2661 | $1.96 \times 10^{-4}$ | 0.026 |
| 8.0 | 0.0317 | 0.2426 | $3.22 \times 10^{-5}$ | 0.038 |

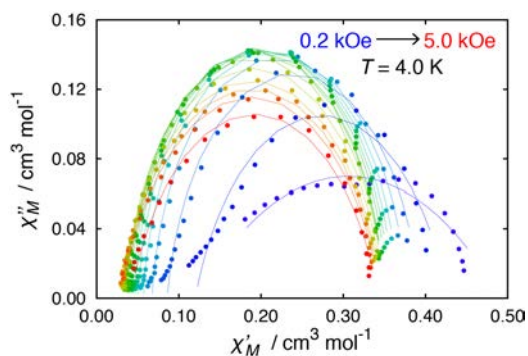

**Fig. S13** Cole-Cole plot for **3** under 0.2–5.0 kOe. The solid lines represent the fit to a generalized Debye model.

**Table S12** Cole-Cole fit values for **3** at 4 K with an applied dc field of 0.2 to 5.0 kOe.

| $H_{dc} / \text{kOe}$ | $\chi_S / \text{cm}_3 \text{mol}^{-1}$ | $\chi_T / \text{cm}_3 \text{mol}^{-1}$ | $\tau / \text{s}$     | $\alpha$ |
|-----------------------|----------------------------------------|----------------------------------------|-----------------------|----------|
| 0.2                   | 0.1228                                 | 0.4895                                 | $2.48 \times 10^{-2}$ | 0.54     |
| 0.4                   | 0.1200                                 | 0.4271                                 | $1.40 \times 10^{-1}$ | 0.24     |
| 0.6                   | 0.0859                                 | 0.3930                                 | $1.82 \times 10^{-1}$ | 0.11     |
| 0.8                   | 0.0674                                 | 0.3774                                 | $1.92 \times 10^{-1}$ | 0.07     |
| 1.0                   | 0.0570                                 | 0.3673                                 | $1.90 \times 10^{-1}$ | 0.06     |
| 1.2                   | 0.0505                                 | 0.3611                                 | $1.83 \times 10^{-1}$ | 0.05     |
| 1.4                   | 0.0462                                 | 0.3567                                 | $1.76 \times 10^{-1}$ | 0.05     |
| 1.6                   | 0.0434                                 | 0.3530                                 | $1.68 \times 10^{-1}$ | 0.05     |
| 1.8                   | 0.0403                                 | 0.3497                                 | $1.59 \times 10^{-1}$ | 0.05     |
| 2.0                   | 0.0379                                 | 0.3496                                 | $1.51 \times 10^{-1}$ | 0.06     |
| 2.5                   | 0.0341                                 | 0.3501                                 | $1.30 \times 10^{-1}$ | 0.08     |
| 3.0                   | 0.0329                                 | 0.3486                                 | $1.10 \times 10^{-1}$ | 0.11     |
| 3.5                   | 0.0297                                 | 0.3478                                 | $9.75 \times 10^{-2}$ | 0.15     |
| 4.0                   | 0.0291                                 | 0.3474                                 | $8.82 \times 10^{-2}$ | 0.18     |
| 4.5                   | 0.0303                                 | 0.3466                                 | $7.30 \times 10^{-2}$ | 0.20     |
| 5.0                   | 0.0411                                 | 0.3431                                 | $4.85 \times 10^{-2}$ | 0.22     |



Ac susceptibility measurements for  $4 \cdot \text{CH}_3\text{OH}$ .

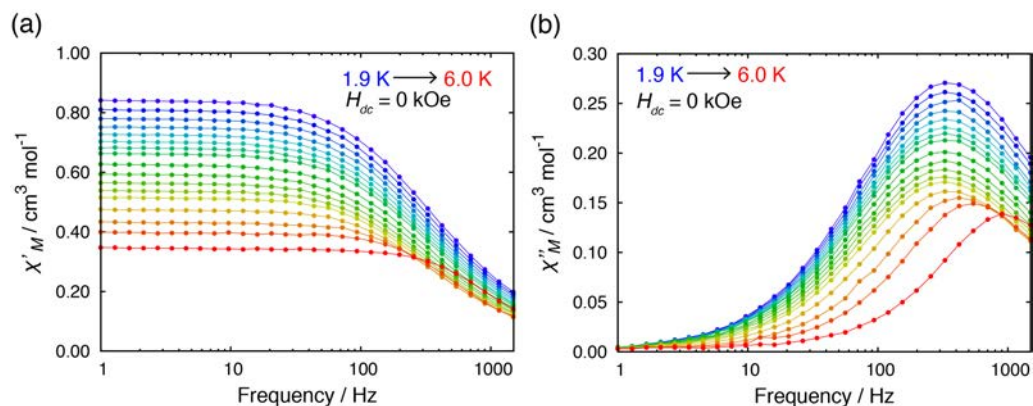

**Fig. S14** Temperature dependence of (a) the in-phase  $\chi'_M$  vs. frequency plots and (b) out-of-phase  $\chi''_M$  vs. frequency plots for  $4 \cdot \text{CH}_3\text{OH}$  in 0 Oe dc field with ac frequency of 1–1488 Hz (1.9 K–6.0 K). The lines are a guide for the eye.

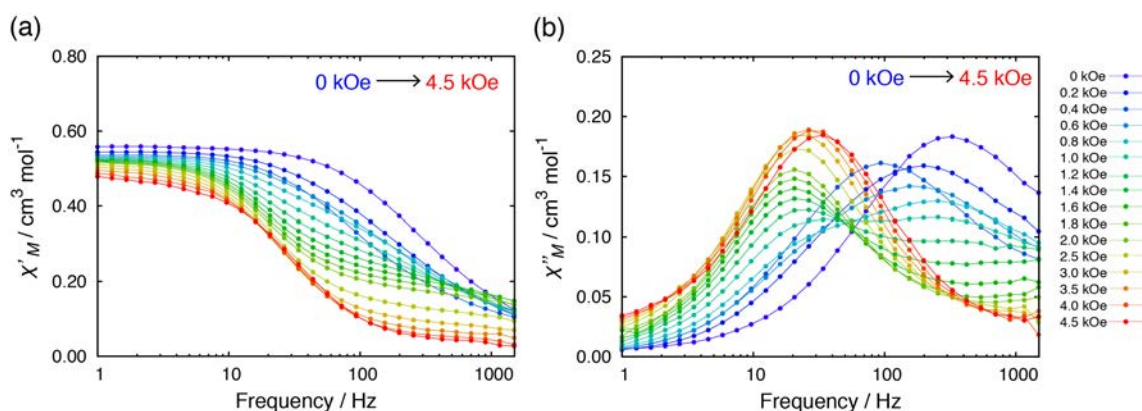

**Fig. S15** Dc field dependence of (a) the in-phase  $\chi'_M$  vs. frequency plots and (b) out-of-phase  $\chi''_M$  vs. frequency plots for  $4 \cdot \text{CH}_3\text{OH}$  with ac frequency of 1–1488 Hz at 3.4 K. The lines are a guide for the eye.

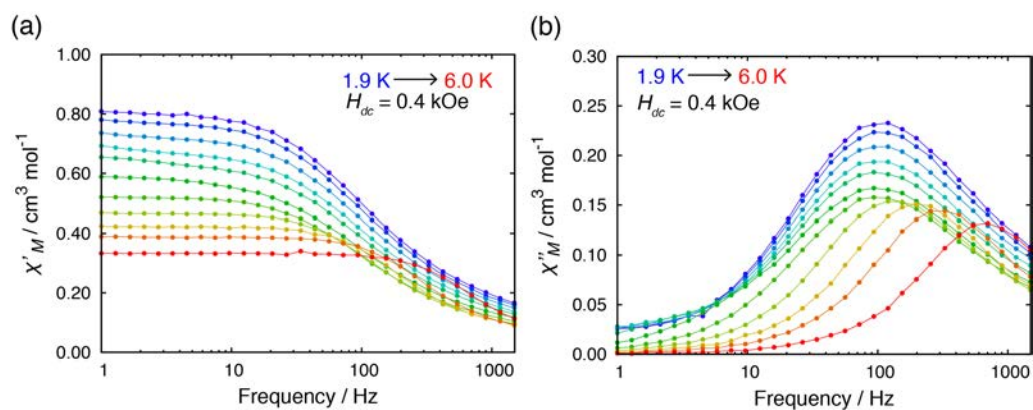

**Fig. S16** Temperature dependence of (a) the in-phase  $\chi'_M$  vs. frequency plots and (b) out-of-phase  $\chi''_M$  vs. frequency plots for  $4 \cdot \text{CH}_3\text{OH}$  in 0.4 kOe dc field with ac frequency of 1–1488 Hz

(1.9 K–6.0 K). The lines are a guide for the eye.

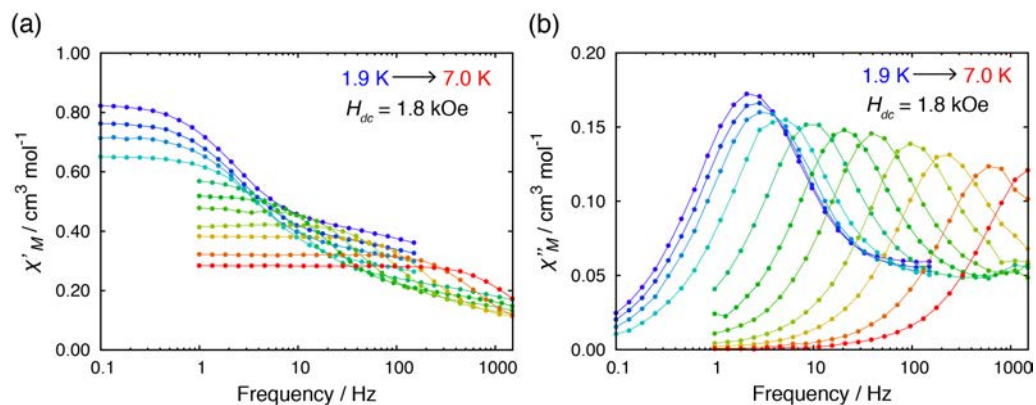

**Fig. S17** Temperature dependence of (a) the in-phase  $\chi'_{M}$  vs. frequency plots and (b) out-of-phase  $\chi''_{M}$  vs. frequency plots for  $4 \cdot \text{CH}_3\text{OH}$  in 1.8 kOe dc field with ac frequency of 0.1–1488 Hz (1.9 K–7.0 K). The lines are a guide for the eye.

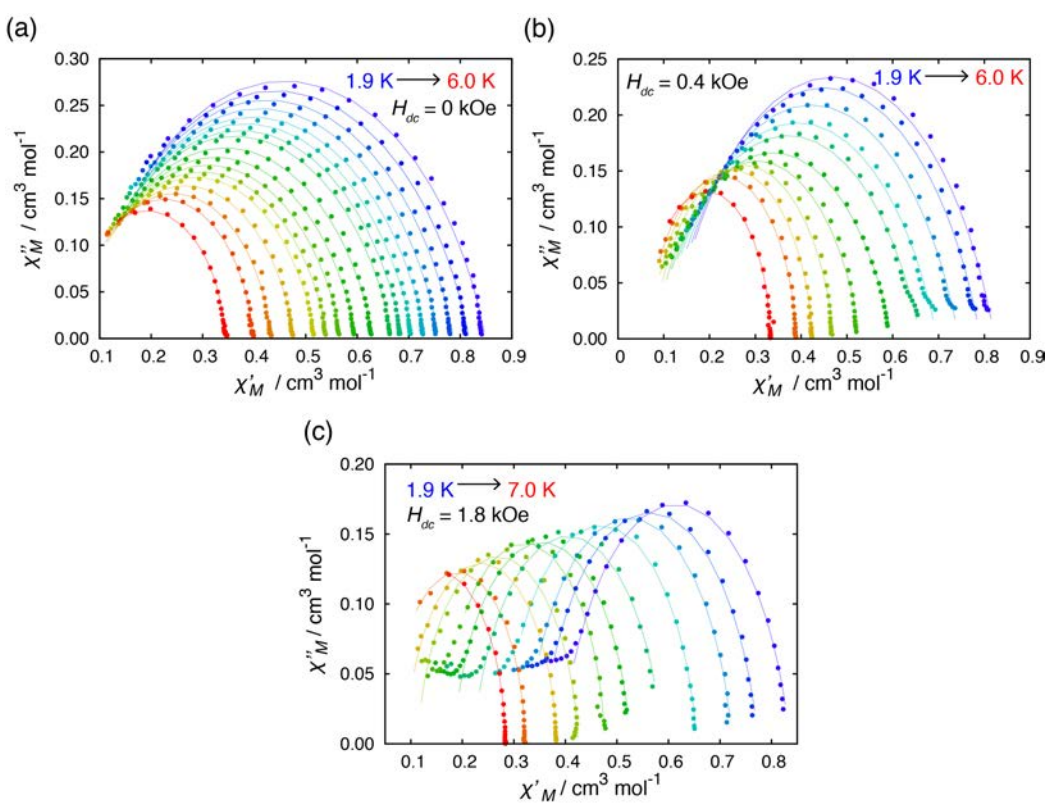

**Fig. S18** Cole-Cole plot for  $4 \cdot \text{CH}_3\text{OH}$  (a) in zero field from 1.9 to 6 K, (b) in 0.4 kOe dc field from 1.9 to 6 K and (c) in 1.8 Oe dc field from 1.9 to 7 K. The solid lines represent the fit to a generalized Debye model.

**Table S13** Cole-Cole fit values for 4·CH<sub>3</sub>OH in zero dc field from 1.9 to 6.0 K.

| $T / \text{K}$ | $\chi_S / \text{cm}_3 \text{mol}^{-1}$ | $\chi_T / \text{cm}_3 \text{mol}^{-1}$ | $\tau / \text{s}$     | $\alpha$ |
|----------------|----------------------------------------|----------------------------------------|-----------------------|----------|
| 1.9            | 0.0694                                 | 0.8491                                 | $4.40 \times 10^{-4}$ | 0.215    |
| 2.0            | 0.0652                                 | 0.8176                                 | $4.42 \times 10^{-4}$ | 0.217    |
| 2.1            | 0.0633                                 | 0.7876                                 | $4.47 \times 10^{-4}$ | 0.217    |
| 2.2            | 0.0651                                 | 0.7593                                 | $4.54 \times 10^{-4}$ | 0.213    |
| 2.3            | 0.0596                                 | 0.7342                                 | $4.53 \times 10^{-4}$ | 0.218    |
| 2.4            | 0.0582                                 | 0.7102                                 | $4.56 \times 10^{-4}$ | 0.216    |
| 2.5            | 0.0574                                 | 0.6893                                 | $4.60 \times 10^{-4}$ | 0.217    |
| 2.6            | 0.0551                                 | 0.6694                                 | $4.60 \times 10^{-4}$ | 0.216    |
| 2.8            | 0.0558                                 | 0.6322                                 | $4.68 \times 10^{-4}$ | 0.214    |
| 3.0            | 0.0533                                 | 0.5990                                 | $4.68 \times 10^{-4}$ | 0.211    |
| 3.2            | 0.0520                                 | 0.5695                                 | $4.65 \times 10^{-4}$ | 0.206    |
| 3.4            | 0.0533                                 | 0.5429                                 | $4.61 \times 10^{-4}$ | 0.197    |
| 3.6            | 0.0534                                 | 0.5190                                 | $4.51 \times 10^{-4}$ | 0.185    |
| 4.0            | 0.0549                                 | 0.4771                                 | $4.18 \times 10^{-4}$ | 0.159    |
| 4.5            | 0.0536                                 | 0.4335                                 | $3.52 \times 10^{-4}$ | 0.126    |
| 5.0            | 0.0519                                 | 0.3978                                 | $2.85 \times 10^{-4}$ | 0.091    |
| 6.0            | 0.0382                                 | 0.3443                                 | $1.64 \times 10^{-4}$ | 0.069    |

**Table S14** Cole-Cole fit values for 4·CH<sub>3</sub>OH in 0.4 kOe dc field from 1.9 to 6.0 K.

| $T / \text{K}$ | $\chi_S / \text{cm}_3 \text{mol}^{-1}$ | $\chi_T / \text{cm}_3 \text{mol}^{-1}$ | $\tau / \text{s}$     | $\alpha$ |
|----------------|----------------------------------------|----------------------------------------|-----------------------|----------|
| 1.9            | 0.1150                                 | 0.8227                                 | $1.29 \times 10^{-3}$ | 0.256    |
| 2.0            | 0.1090                                 | 0.7917                                 | $1.30 \times 10^{-3}$ | 0.259    |
| 2.2            | 0.1003                                 | 0.7443                                 | $1.33 \times 10^{-3}$ | 0.267    |
| 2.4            | 0.0891                                 | 0.6968                                 | $1.36 \times 10^{-3}$ | 0.279    |
| 2.6            | 0.0826                                 | 0.6604                                 | $1.40 \times 10^{-3}$ | 0.285    |
| 3.0            | 0.0780                                 | 0.5989                                 | $1.45 \times 10^{-3}$ | 0.276    |
| 3.5            | 0.0798                                 | 0.5297                                 | $1.32 \times 10^{-3}$ | 0.216    |
| 4.0            | 0.0773                                 | 0.4720                                 | $1.03 \times 10^{-3}$ | 0.151    |
| 4.5            | 0.0725                                 | 0.4254                                 | $7.21 \times 10^{-4}$ | 0.098    |
| 5.0            | 0.0665                                 | 0.3893                                 | $4.94 \times 10^{-4}$ | 0.067    |
| 6.0            | 0.0560                                 | 0.3333                                 | $2.31 \times 10^{-4}$ | 0.032    |

**Table S15** Cole-Cole fit values for 4·CH<sub>3</sub>OH in 1.8 kOe dc field from 1.9 to 7.0 K.

| $T / \text{K}$ | $\chi_S / \text{cm}_3 \text{mol}^{-1}$ | $\chi_T / \text{cm}_3 \text{mol}^{-1}$ | $\tau / \text{s}$     | $\alpha$ |
|----------------|----------------------------------------|----------------------------------------|-----------------------|----------|
| 1.9            | 0.3931                                 | 0.8358                                 | $6.50 \times 10^{-2}$ | 0.161    |
| 2.1            | 0.3532                                 | 0.7743                                 | $5.68 \times 10^{-2}$ | 0.152    |
| 2.3            | 0.3240                                 | 0.7242                                 | $4.82 \times 10^{-2}$ | 0.135    |
| 2.6            | 0.2813                                 | 0.6549                                 | $3.26 \times 10^{-2}$ | 0.113    |
| 3.0            | 0.2214                                 | 0.5883                                 | $1.53 \times 10^{-2}$ | 0.133    |
| 3.8            | 0.1637                                 | 0.4765                                 | $3.63 \times 10^{-3}$ | 0.054    |
| 4.4            | 0.1125                                 | 0.4258                                 | $1.35 \times 10^{-3}$ | 0.099    |
| 5.0            | 0.0897                                 | 0.3843                                 | $6.56 \times 10^{-4}$ | 0.083    |
| 6.0            | 0.0598                                 | 0.3220                                 | $2.38 \times 10^{-4}$ | 0.041    |
| 7.0            | 0.0228                                 | 0.2838                                 | $9.24 \times 10^{-5}$ | 0.034    |

*i.* Some data points in high field at low temperature region were removed from fitting to model with single Debye function.

Ac susceptibility measurements for Zn<sup>II</sup>-doped samples:  $1'_{x} \cdot \text{CH}_3\text{OH}$ .

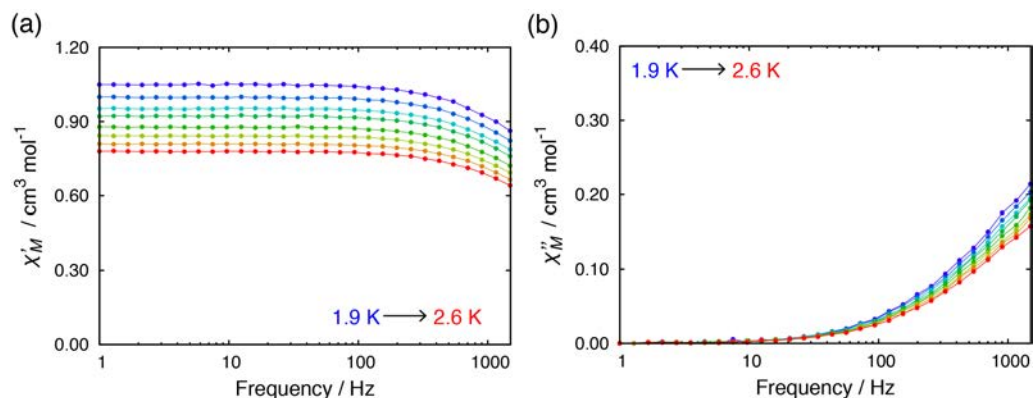

**Fig. S19** Temperature dependence of (a) the in-phase  $\chi'_M$  vs. frequency plots and (b) out-of-phase  $\chi''_M$  vs. frequency plots for  $1'_{0.33} \cdot \text{CH}_3\text{OH}$  in 0 kOe dc field with ac frequency of 1–1488 Hz (1.9 K–2.6 K). The lines are a guide for the eye.

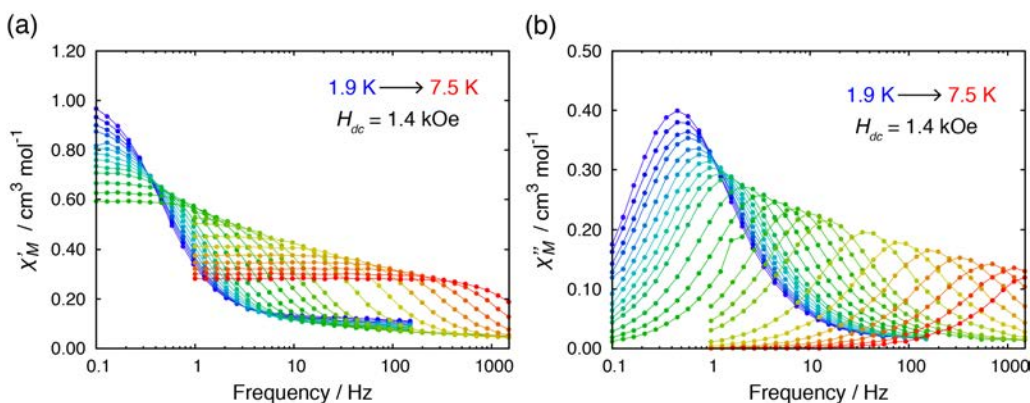

**Fig. S20** Temperature dependence of (a) the in-phase  $\chi'_M$  vs. frequency plots and (b) out-of-phase  $\chi''_M$  vs. frequency plots for  $1'_{0.33} \cdot \text{CH}_3\text{OH}$  in 1.4 kOe dc field with ac frequency of 0.1–1488 Hz. The lines are a guide for the eye.

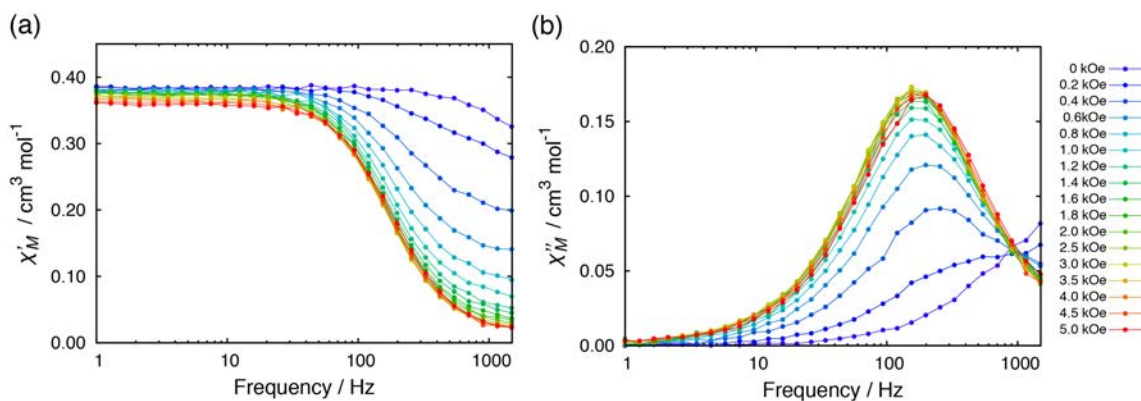

**Fig. S21** Dc field dependence of (a) the in-phase  $\chi'_M$  vs. frequency plots and (b) out-of-phase

$\chi''_M$  vs. frequency plots for  $1'_{0.33}\cdot\text{CH}_3\text{OH}$  with ac frequency of 1–1488 Hz at 5.5 K. The lines are a guide for the eye.

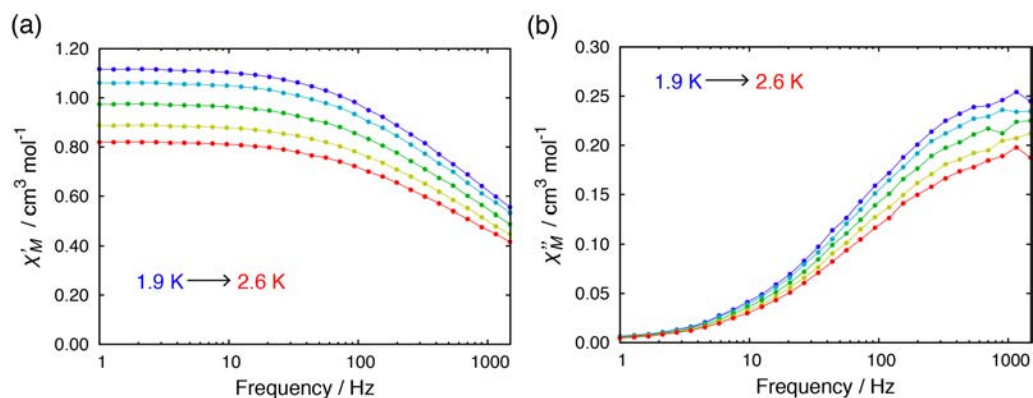

**Fig. S22** Temperature dependence of (a) the in-phase  $\chi'_M$  vs. frequency plots and (b) out-of-phase  $\chi''_M$  vs. frequency plots for  $1'_{0.12}\cdot\text{CH}_3\text{OH}$  in 0 kOe dc field with ac frequency of 1–1488 Hz (1.9 K–2.6 K). The lines are a guide for the eye.

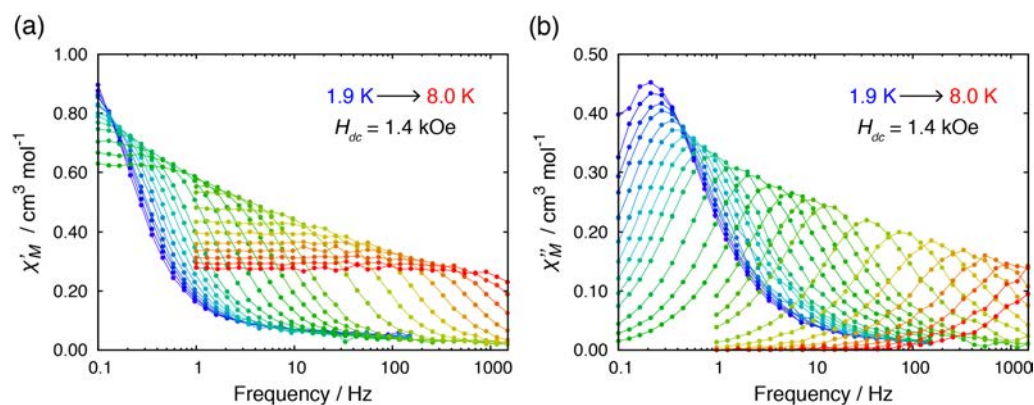

**Fig. S23** Temperature dependence of (a) the in-phase  $\chi'_M$  vs. frequency plots and (b) out-of-phase  $\chi''_M$  vs. frequency plots for  $1'_{0.12}\cdot\text{CH}_3\text{OH}$  in 1.4 kOe dc field with ac frequency of 0.1–1488 Hz. The lines are a guide for the eye.

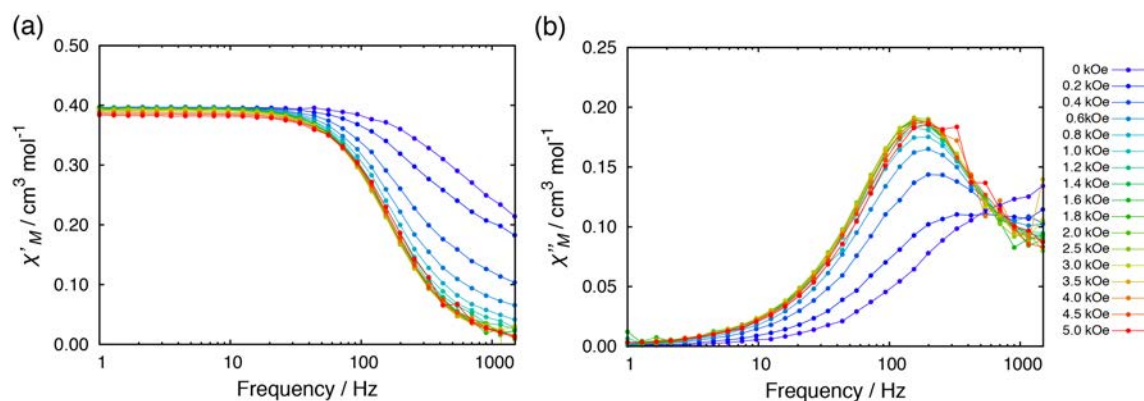

**Fig. S24** Dc field dependence of (a) the in-phase  $\chi'_M$  vs. frequency plots and (b) out-of-phase  $\chi''_M$  vs. frequency plots for  $\mathbf{1}'_{0.12}\cdot\text{CH}_3\text{OH}$  with ac frequency of 1–1488 Hz at 5.5 K. The lines are a guide for the eye.

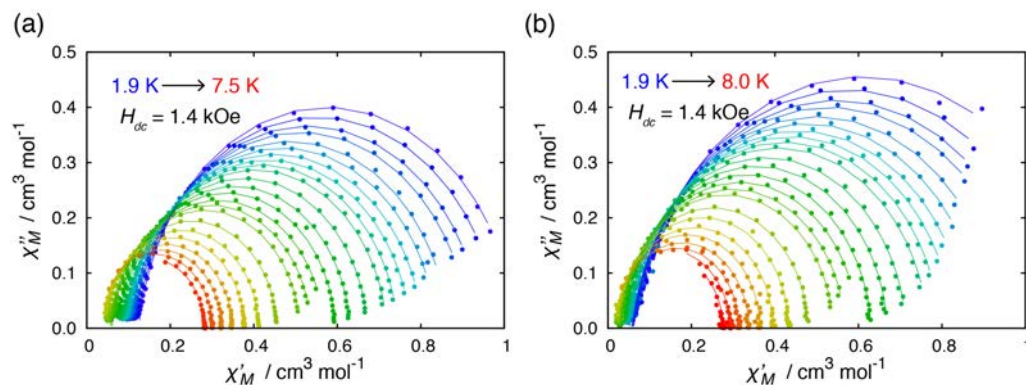

**Fig. S25** Cole-Cole plot for (a)  $\mathbf{1}'_{0.33}\cdot\text{CH}_3\text{OH}$  and (b)  $\mathbf{1}'_{0.12}\cdot\text{CH}_3\text{OH}$  in 1.4 kOe dc field from 1.9 to 8 K. The solid lines represent the fit to a generalized Debye model.

**Table S16** Cole-Cole fit values for  $\mathbf{1}'_{0.33}\cdot\text{CH}_3\text{OH}$  in 1.4 kOe dc field from 1.9 to 7.5 K.

| $T / \text{K}$ | $\chi_S / \text{cm}_3 \text{mol}^{-1}$ | $\chi_T / \text{cm}_3 \text{mol}^{-1}$ | $\tau / \text{s}$     | $\alpha$ |
|----------------|----------------------------------------|----------------------------------------|-----------------------|----------|
| 1.9            | 0.1244                                 | 1.0291                                 | $3.34 \times 10^{-1}$ | 0.078    |
| 2.0            | 0.1185                                 | 0.9909                                 | $3.06 \times 10^{-1}$ | 0.084    |
| 2.1            | 0.1130                                 | 0.9478                                 | $2.74 \times 10^{-1}$ | 0.083    |
| 2.2            | 0.1096                                 | 0.9175                                 | $2.53 \times 10^{-1}$ | 0.082    |
| 2.3            | 0.1049                                 | 0.8680                                 | $2.19 \times 10^{-1}$ | 0.076    |
| 2.4            | 0.1018                                 | 0.8385                                 | $1.94 \times 10^{-1}$ | 0.076    |
| 2.5            | 0.0965                                 | 0.8057                                 | $1.69 \times 10^{-1}$ | 0.074    |
| 2.6            | 0.0941                                 | 0.7755                                 | $1.45 \times 10^{-1}$ | 0.070    |
| 2.7            | 0.0917                                 | 0.7455                                 | $1.24 \times 10^{-1}$ | 0.063    |
| 2.8            | 0.0888                                 | 0.7190                                 | $1.05 \times 10^{-1}$ | 0.059    |
| 3.0            | 0.0832                                 | 0.6726                                 | $7.35 \times 10^{-2}$ | 0.051    |
| 3.2            | 0.0785                                 | 0.6306                                 | $4.98 \times 10^{-2}$ | 0.044    |
| 3.4            | 0.0732                                 | 0.5957                                 | $3.39 \times 10^{-2}$ | 0.040    |
| 3.6            | 0.0605                                 | 0.5686                                 | $2.24 \times 10^{-2}$ | 0.058    |
| 3.8            | 0.0576                                 | 0.5379                                 | $1.52 \times 10^{-2}$ | 0.047    |
| 4.0            | 0.0545                                 | 0.5109                                 | $1.03 \times 10^{-2}$ | 0.041    |
| 4.5            | 0.0480                                 | 0.4556                                 | $4.17 \times 10^{-3}$ | 0.029    |
| 5.0            | 0.0432                                 | 0.4124                                 | $1.88 \times 10^{-3}$ | 0.024    |
| 5.5            | 0.0392                                 | 0.3775                                 | $9.16 \times 10^{-4}$ | 0.017    |
| 6.0            | 0.0354                                 | 0.3475                                 | $4.74 \times 10^{-4}$ | 0.017    |
| 6.5            | 0.0305                                 | 0.3222                                 | $2.56 \times 10^{-4}$ | 0.016    |
| 7.0            | 0.0244                                 | 0.3008                                 | $1.40 \times 10^{-4}$ | 0.017    |
| 7.5            | 0.0238                                 | 0.2820                                 | $8.05 \times 10^{-5}$ | 0.016    |

**Table S17** Cole-Cole fit values for  $\mathbf{1}'_{0.12}\cdot\text{CH}_3\text{OH}$  in 1.4 kOe dc field from 1.9 to 8.0 K.

| $T / \text{K}$ | $\chi_S / \text{cm}_3 \text{mol}^{-1}$ | $\chi_T / \text{cm}_3 \text{mol}^{-1}$ | $\tau / \text{s}$     | $\alpha$ |
|----------------|----------------------------------------|----------------------------------------|-----------------------|----------|
| 1.9            | 0.0613                                 | 1.1610                                 | $7.85 \times 10^{-1}$ | 0.119    |
| 2.0            | 0.0592                                 | 1.0874                                 | $6.78 \times 10^{-1}$ | 0.111    |
| 2.1            | 0.0572                                 | 1.0368                                 | $5.99 \times 10^{-1}$ | 0.108    |
| 2.2            | 0.0562                                 | 1.0045                                 | $5.45 \times 10^{-1}$ | 0.107    |
| 2.3            | 0.0561                                 | 0.9457                                 | $4.52 \times 10^{-1}$ | 0.094    |
| 2.4            | 0.0521                                 | 0.9014                                 | $3.78 \times 10^{-1}$ | 0.086    |
| 2.5            | 0.0509                                 | 0.8631                                 | $3.13 \times 10^{-1}$ | 0.081    |
| 2.6            | 0.0482                                 | 0.8299                                 | $2.54 \times 10^{-1}$ | 0.075    |
| 2.7            | 0.0480                                 | 0.7975                                 | $2.05 \times 10^{-1}$ | 0.067    |
| 2.8            | 0.0461                                 | 0.7680                                 | $1.64 \times 10^{-1}$ | 0.063    |
| 3.0            | 0.0428                                 | 0.7148                                 | $1.04 \times 10^{-1}$ | 0.052    |
| 3.2            | 0.0411                                 | 0.6695                                 | $6.56 \times 10^{-2}$ | 0.043    |
| 3.4            | 0.0382                                 | 0.6301                                 | $4.17 \times 10^{-2}$ | 0.039    |
| 3.6            | 0.0315                                 | 0.6007                                 | $2.69 \times 10^{-2}$ | 0.046    |
| 3.8            | 0.0290                                 | 0.5681                                 | $1.75 \times 10^{-2}$ | 0.042    |
| 4.0            | 0.0274                                 | 0.5401                                 | $1.16 \times 10^{-2}$ | 0.037    |
| 4.5            | 0.0243                                 | 0.4796                                 | $4.55 \times 10^{-3}$ | 0.026    |
| 5.0            | 0.0226                                 | 0.4332                                 | $2.01 \times 10^{-3}$ | 0.013    |
| 5.5            | 0.0210                                 | 0.3960                                 | $9.75 \times 10^{-4}$ | 0.016    |
| 6.0            | 0.0176                                 | 0.3642                                 | $4.98 \times 10^{-4}$ | 0.014    |
| 6.5            | 0.0177                                 | 0.3382                                 | $2.71 \times 10^{-4}$ | 0.020    |
| 7.0            | 0.0186                                 | 0.3137                                 | $1.48 \times 10^{-4}$ | 0.010    |
| 7.5            | 0.0000                                 | 0.2936                                 | $7.84 \times 10^{-5}$ | 0.024    |
| 8.0            | 0.0000                                 | 0.2766                                 | $4.51 \times 10^{-5}$ | 0.022    |

Ac susceptibility measurements for Zn<sup>II</sup>-doped samples: **2'**<sub>0.52</sub>.

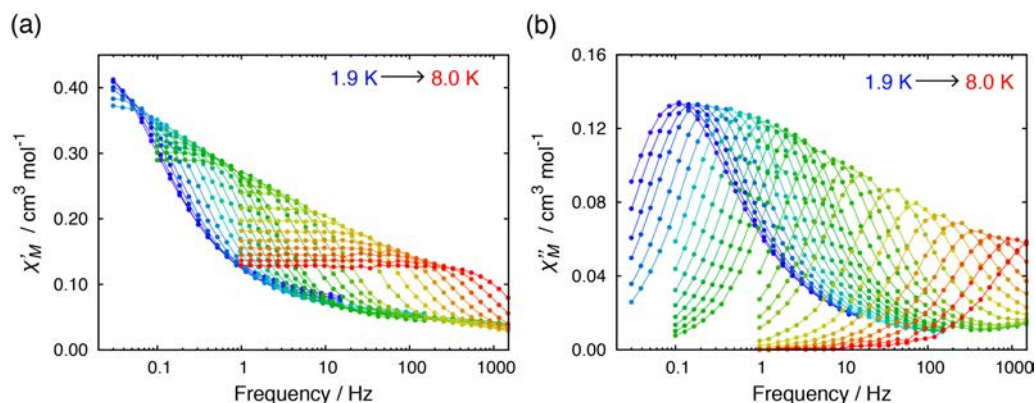

**Fig. S26** Temperature dependence of (a) the in-phase  $\chi'_M$  vs. frequency plots and (b) out-of-phase  $\chi''_M$  vs. frequency plots for **2'**<sub>0.52</sub> in 0 kOe dc field with ac frequency of 0.03–1488 Hz (1.9 K–8.0 K). The lines are a guide for the eye.

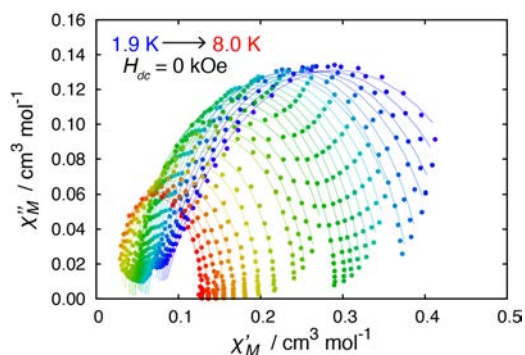

**Fig. S27** Cole-Cole plot for **2'**<sub>0.52</sub> in zero field from 1.9 to 8 K. The solid lines represent the fit to a generalized Debye model.

**Table S18** Cole-Cole fit values for **2'**<sub>0.52</sub> in zero dc field from 1.9 to 8.0 K.

| $T / \text{K}$ | $\chi'_S / \text{cm}^3 \text{mol}^{-1}$ | $\chi'_T / \text{cm}^3 \text{mol}^{-1}$ | $\tau / \text{s}$     | $\alpha$ |
|----------------|-----------------------------------------|-----------------------------------------|-----------------------|----------|
| 1.9            | 0.1546                                  | 0.9800                                  | $1.45 \times 10^0$    | 0.296    |
| 2.0            | 0.1521                                  | 0.9193                                  | $1.17 \times 10^0$    | 0.256    |
| 2.1            | 0.1496                                  | 0.8634                                  | $9.08 \times 10^{-1}$ | 0.213    |
| 2.2            | 0.1464                                  | 0.8276                                  | $7.49 \times 10^{-1}$ | 0.185    |
| 2.3            | 0.1416                                  | 0.7811                                  | $5.50 \times 10^{-1}$ | 0.147    |
| 2.4            | 0.1365                                  | 0.7454                                  | $4.14 \times 10^{-1}$ | 0.120    |
| 2.6            | 0.1164                                  | 0.7097                                  | $2.35 \times 10^{-1}$ | 0.122    |
| 2.7            | 0.1131                                  | 0.6810                                  | $1.78 \times 10^{-1}$ | 0.103    |
| 2.8            | 0.1082                                  | 0.6551                                  | $1.33 \times 10^{-1}$ | 0.088    |
| 2.9            | 0.1049                                  | 0.6317                                  | $1.01 \times 10^{-1}$ | 0.076    |
| 3.0            | 0.1012                                  | 0.6114                                  | $7.81 \times 10^{-2}$ | 0.069    |
| 3.1            | 0.0976                                  | 0.5924                                  | $6.07 \times 10^{-2}$ | 0.061    |
| 3.2            | 0.0911                                  | 0.5688                                  | $4.75 \times 10^{-2}$ | 0.055    |
| 3.4            | 0.0908                                  | 0.5588                                  | $3.05 \times 10^{-2}$ | 0.081    |



|     |        |        |                       |       |
|-----|--------|--------|-----------------------|-------|
| 3.6 | 0.0857 | 0.5262 | $1.97 \times 10^{-2}$ | 0.069 |
| 3.8 | 0.0806 | 0.4995 | $1.32 \times 10^{-2}$ | 0.068 |
| 4.0 | 0.0764 | 0.4747 | $9.11 \times 10^{-3}$ | 0.060 |
| 4.5 | 0.0663 | 0.4246 | $4.03 \times 10^{-3}$ | 0.055 |
| 5.0 | 0.0589 | 0.3851 | $2.07 \times 10^{-3}$ | 0.046 |
| 5.5 | 0.0502 | 0.3527 | $1.15 \times 10^{-3}$ | 0.050 |
| 6.0 | 0.0443 | 0.3250 | $6.86 \times 10^{-4}$ | 0.044 |
| 6.5 | 0.0376 | 0.3015 | $4.21 \times 10^{-4}$ | 0.040 |
| 7.0 | 0.0307 | 0.2821 | $2.57 \times 10^{-4}$ | 0.035 |
| 7.5 | 0.0234 | 0.2639 | $1.52 \times 10^{-4}$ | 0.020 |
| 8.0 | 0.0170 | 0.2482 | $8.90 \times 10^{-5}$ | 0.002 |

---

Ac susceptibility measurements for Zn<sup>II</sup>-doped samples: **3'**<sub>0.67</sub>.

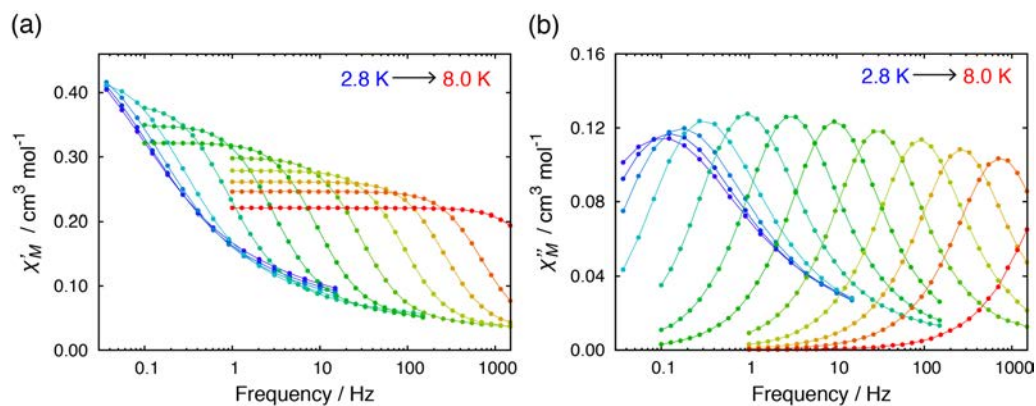

**Fig. S28** Temperature dependence of (a) the in-phase  $\chi'_M$  vs. frequency plots and (b) out-of-phase  $\chi''_M$  vs. frequency plots for **3'**<sub>0.67</sub> in 0 kOe dc field with ac frequency of 0.03–1488 Hz (2.8 K–8.0 K). The lines are a guide for the eye.

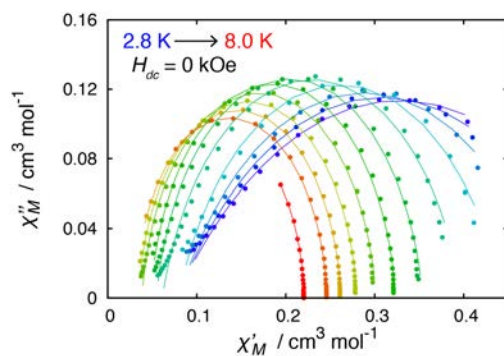

**Fig. S29** Cole-Cole plot for **3'**<sub>0.67</sub> in zero field from 2.8 to 8 K. The solid lines represent the fit to a generalized Debye model.

**Table S19** Cole-Cole fit values for **3'**<sub>0.67</sub> in zero dc field from 2.8 to 8.0 K.

| $T / \text{K}$ | $\chi_S / \text{cm}_3 \text{ mol}^{-1}$ | $\chi_T / \text{cm}_3 \text{ mol}^{-1}$ | $\tau / \text{s}$     | $\alpha$ |
|----------------|-----------------------------------------|-----------------------------------------|-----------------------|----------|
| 2.8            | 0.0769                                  | 0.5789                                  | $1.71 \times 10^0$    | 0.459    |
| 3.0            | 0.0782                                  | 0.5393                                  | $1.27 \times 10^0$    | 0.409    |
| 3.2            | 0.0796                                  | 0.4967                                  | $8.59 \times 10^{-1}$ | 0.344    |
| 3.5            | 0.0789                                  | 0.4444                                  | $4.58 \times 10^{-1}$ | 0.247    |
| 4.0            | 0.0612                                  | 0.3982                                  | $1.53 \times 10^{-1}$ | 0.185    |
| 4.5            | 0.0545                                  | 0.3543                                  | $4.87 \times 10^{-2}$ | 0.110    |
| 5.0            | 0.0484                                  | 0.3234                                  | $1.60 \times 10^{-2}$ | 0.070    |
| 5.5            | 0.0387                                  | 0.3012                                  | $5.12 \times 10^{-3}$ | 0.068    |
| 6.0            | 0.0344                                  | 0.2798                                  | $1.69 \times 10^{-3}$ | 0.052    |
| 6.5            | 0.0300                                  | 0.2618                                  | $5.79 \times 10^{-4}$ | 0.045    |
| 7.0            | 0.0272                                  | 0.2462                                  | $2.17 \times 10^{-4}$ | 0.035    |
| 8.0            | 0.0212                                  | 0.2202                                  | $4.03 \times 10^{-5}$ | 0.013    |

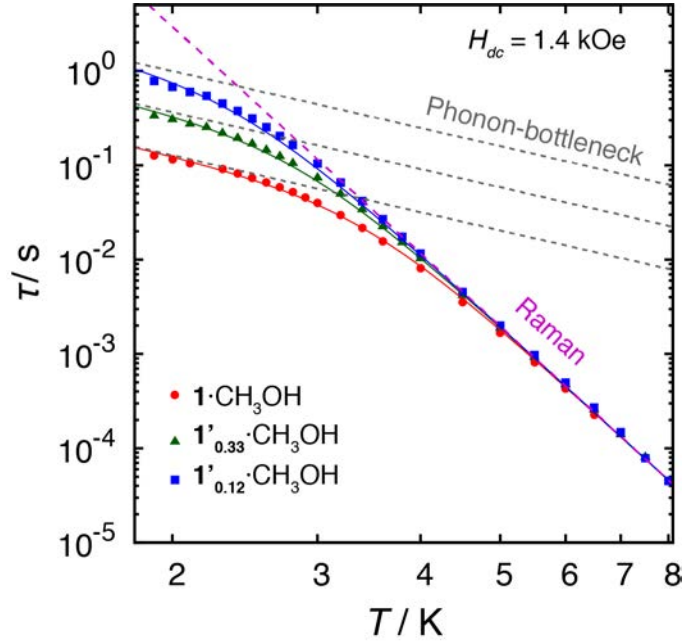

**Fig. S30** Temperature dependence of the relaxation time  $\tau$  for  $1 \cdot \text{CH}_3\text{OH}$ ,  $1'_{0.33} \cdot \text{CH}_3\text{OH}$  and  $1'_{0.12} \cdot \text{CH}_3\text{OH}$  under 1.4 kOe dc field. The dashed lines indicate fitted lines for a single relaxation process of Raman  $\tau^{-1} = CT^n$  and phonon-bottleneck limited direct process  $\tau^{-1} = A_{pb}T^2$ . The solid lines indicate the sum of the two relaxation processes.

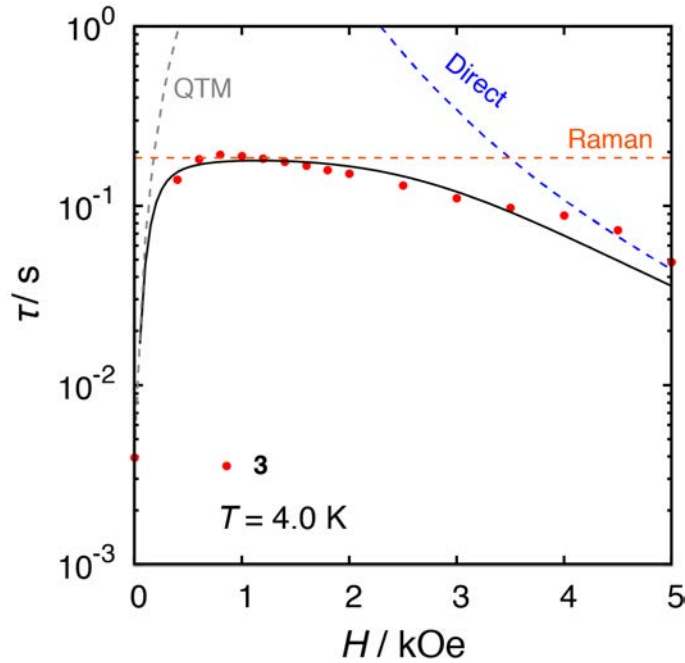

**Fig. S31** Field dependence of the relaxation time  $\tau$  for **3** at 4.0 K. The dashed lines indicate fitted lines for a single relaxation process of QTM  $\tau^{-1} = B_1/(1+B_2H^2)$ , Raman  $\tau^{-1} = CT^n$  and direct process  $\tau^{-1} = ATH^d$ . The solid lines indicate the sum of the two relaxation processes.

**Table S20** Fitting parameters for the relaxation dynamics in **1**·CH<sub>3</sub>OH, **1'**<sub>0.33</sub>·CH<sub>3</sub>OH and **1'**<sub>0.12</sub>·CH<sub>3</sub>OH.

|                                               | $H_{dc}/\text{kOe}$ | $A_{pb}/\text{s}^{-1}\text{K}^{-2}$ | $B_1/\text{s}^{-1}$ | $B_2/\text{kOe}^{-2}$ | $C/\text{s}^{-1}\text{K}^{-n}$ | $n$ |
|-----------------------------------------------|---------------------|-------------------------------------|---------------------|-----------------------|--------------------------------|-----|
| <b>1</b> ·CH <sub>3</sub> OH                  | 1.4                 | 1.96                                |                     |                       | $1.35 \times 10^{-3}$          | 8.0 |
| <b>1'</b> <sub>0.33</sub> ·CH <sub>3</sub> OH | 1.4                 | $6.84 \times 10^{-1}$               |                     |                       | $1.35 \times 10^{-3}$          | 8.0 |
| <b>1'</b> <sub>0.12</sub> ·CH <sub>3</sub> OH | 1.4                 | $2.51 \times 10^{-1}$               | 5006                | 46.3                  | $1.35 \times 10^{-3}$          | 8.0 |

**Table S21** Fitting parameters for the relaxation dynamics in **2** and **2'**<sub>0.52</sub>.

|                           | $H_{dc}/\text{kOe}$ | $C/\text{s}^{-1}\text{K}^{-n}$ | $n$ |
|---------------------------|---------------------|--------------------------------|-----|
| <b>2</b>                  | 0                   | $1.18 \times 10^{-2}$          | 6.6 |
|                           | 0.4                 | $1.18 \times 10^{-2}$          | 6.6 |
| <b>2'</b> <sub>0.52</sub> | 0                   | $1.18 \times 10^{-2}$          | 6.6 |

**Table S22** Fitting parameters for the relaxation dynamics in **3** and **3'**<sub>0.67</sub>.

|                           | $H_{dc}/\text{kOe}$ | $A/\text{kOe}^{-4}\text{s}^{-1}$ | $B_1/\text{s}^{-1}$ | $B_2/\text{kOe}^{-2}$ | $C/\text{s}^{-1}\text{K}^{-n}$ | $n$ | $\tau_0/\text{s}$      | $\Delta_{Orbach}/\text{cm}^{-1}$ |
|---------------------------|---------------------|----------------------------------|---------------------|-----------------------|--------------------------------|-----|------------------------|----------------------------------|
| <b>3</b>                  | 0                   | $9.05 \times 10^{-3}$            | 237.7               | 1361                  |                                |     | $2.40 \times 10^{-10}$ | 63.9                             |
|                           | 0.8                 |                                  |                     |                       | $4.69 \times 10^{-4}$          | 6.7 | $4.77 \times 10^{-10}$ | 63.9                             |
| <b>3'</b> <sub>0.67</sub> | 0                   |                                  |                     |                       | $4.69 \times 10^{-4}$          | 6.7 | $4.77 \times 10^{-10}$ | 63.9                             |

**Table S23** Fitting parameters for the relaxation dynamics in **4**·CH<sub>3</sub>OH.

|                              | $H_{dc}/\text{kOe}$ | $\tau_{QM}/\text{s}$  | $C/\text{s}^{-1}\text{K}^{-n}$ | $n$  |
|------------------------------|---------------------|-----------------------|--------------------------------|------|
| <b>4</b> ·CH <sub>3</sub> OH | 0                   | $4.67 \times 10^{-4}$ | $4.68 \times 10^{-2}$          | 6.41 |
|                              | 0.4                 | $1.43 \times 10^{-3}$ | $4.68 \times 10^{-2}$          | 6.41 |
|                              | 1.8                 | $8.82 \times 10^{-2}$ | $4.68 \times 10^{-2}$          | 6.41 |

### 3. Powder X-ray diffraction measurement.

Powder XRD data was collected at room temperature on a Rigaku RINT 2100 powder diffractometer using Cu K $\alpha$  radiation ( $\lambda = 1.5418 \text{ \AA}$ ). The sample was ground in an agate mortar and placed on a silicon sample holder. The simulated powder pattern was calculated from the cif using the Mercury 3.8 software.

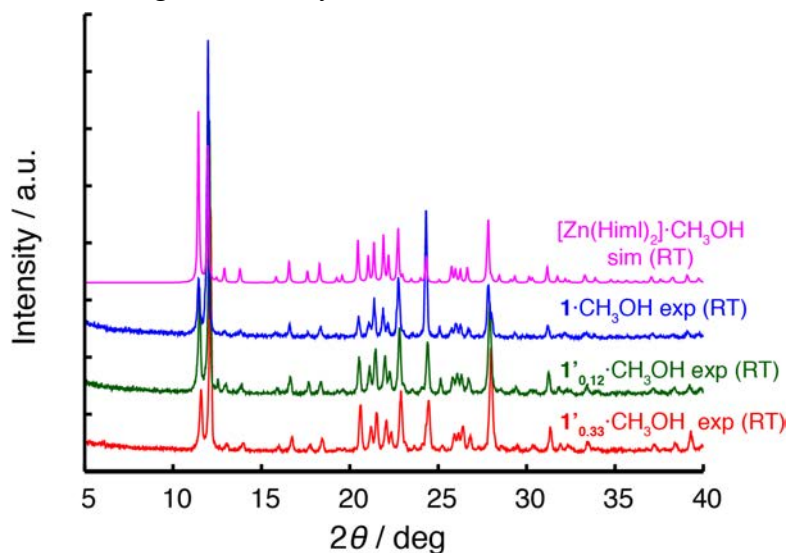

**Fig. S32** Powder XRD patterns of 1·CH<sub>3</sub>OH, 1'<sub>0.12</sub>·CH<sub>3</sub>OH, 1'<sub>0.33</sub>·CH<sub>3</sub>OH and the simulated pattern of [Zn(Himl)<sub>2</sub>]·CH<sub>3</sub>OH at room temperature. Error! Bookmark not defined.

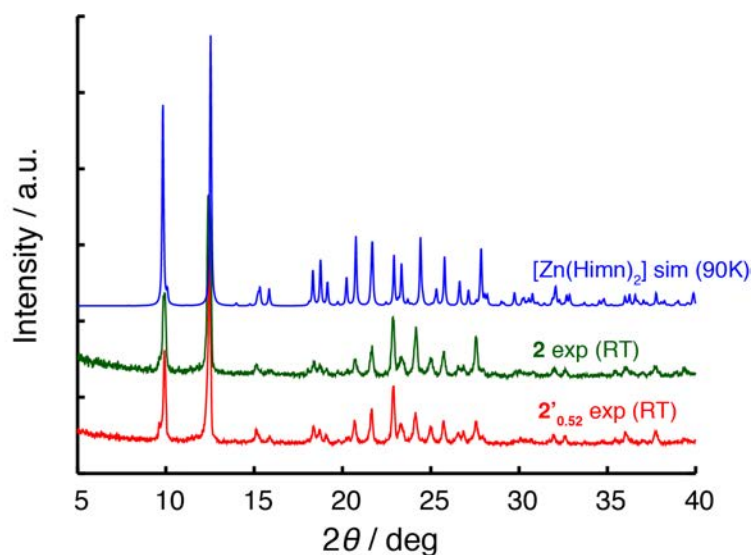

**Fig. S33** Powder XRD patterns of 2 and 2'<sub>0.52</sub> at room temperature, and the simulated pattern of [Zn(Himn)<sub>2</sub>] at 90 K.<sup>2</sup>

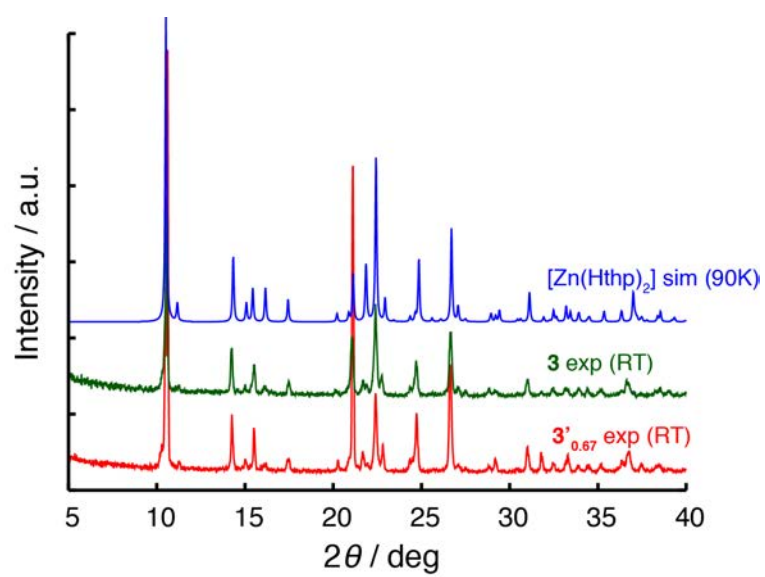

**Fig. S34** Powder XRD patterns of **3** and **3'<sub>0.67</sub>** at room temperature, and the simulated patterns of [Zn(Hthp)<sub>2</sub>] at 90 K.<sup>3</sup>
